# Supplementary material for: NIR absorbing ferrocenyl perylenediimide-based donor–acceptor chromophores
Source: Royal Society of Chemistry journal article supplement (doi:10.1039/d4dt01661k), 2024-01-01
Supplement: d4dt01661k1.pdf [file d4dt01661k1.pdf]

## Supporting Information

*for*

### NIR absorbing ferrocenyl perylenediimide based donor-acceptor chromophores

Mohd Wazid and Rajneesh Misra\*

Department of Chemistry, Indian Institute of Technology Indore (M.P.) 453552, India

**E-mail: [rajneeshmisra@iiti.ac.in](mailto:rajneeshmisra@iiti.ac.in)**

|                                                               |                |
|---------------------------------------------------------------|----------------|
| <b>1. General Methods.....</b>                                | <b>S2</b>      |
| <b>2. Spectroscopic data.....</b>                             | <b>S3-S17</b>  |
| <b>3. Photophysical Study.....</b>                            | <b>S18</b>     |
| <b>4. Electrochemistry Study .....</b>                        | <b>S19-S21</b> |
| <b>5. Spectroelectrochemistry Study.....</b>                  | <b>S22</b>     |
| <b>6. Molecular electrostatic potential map and TDOS.....</b> | <b>S23-S24</b> |
| <b>7. DFT and TD-DFT calculation.....</b>                     | <b>S25-S68</b> |
| <b>8. References.....</b>                                     | <b>S69</b>     |

## General Methods

All the moisture and oxygen-sensitive reactions were performed in an inert atmosphere using the standard inert atmosphere method.  $^1\text{H}$  NMR spectra were measured on a Bruker Advance (III) 400 MHz/500 MHz, and  $^{13}\text{C}\{^1\text{H}\}$  NMR spectra were measured at 100 MHz/125 MHz using  $\text{CDCl}_3$  as the internal solvent. The  $^1\text{H}$  NMR chemical shifts are recorded in parts per million (ppm) relative to the solvent residual peak ( $\text{CDCl}_3$ , 7.26 ppm). The  $^{13}\text{C}\{^1\text{H}\}$  NMR shifts are reported relative to the solvent residual peak ( $\text{CDCl}_3$ , 77.16 ppm). The multiplicities are given as s (singlet), d (doublet), t (triplet), q (quartet), and m (multiple), and the coupling constant values (J) are reported in Hz. Thermogravimetric analysis was performed on a Mettler Toledo thermal analysis system. The UV-visible absorption spectra of all compounds were recorded in a PerkinElmer LAMBDA 35 UV-visible Spectrophotometer in DCM solvent at room temperature. Cyclic voltammograms (CVs) and differential pulse voltammetry (DPVs) were recorded on a PalmSens 4 electrochemical analyzer using glassy carbon as a working electrode, Pt wire as the counter electrode, and Ag/AgCl as the reference electrode. The scan rate was  $50 \text{ mV s}^{-1}$  for cyclic voltammetry. A solution of  $(\text{TBA})\text{ClO}_4$  in  $\text{CH}_2\text{Cl}_2$  (0.1 M) was used as the supporting electrolyte.

## Characterization

### $^1\text{H-NMR}$ , $^{13}\text{C-NMR}$ , MALDI of PDI derivatives 1–5.

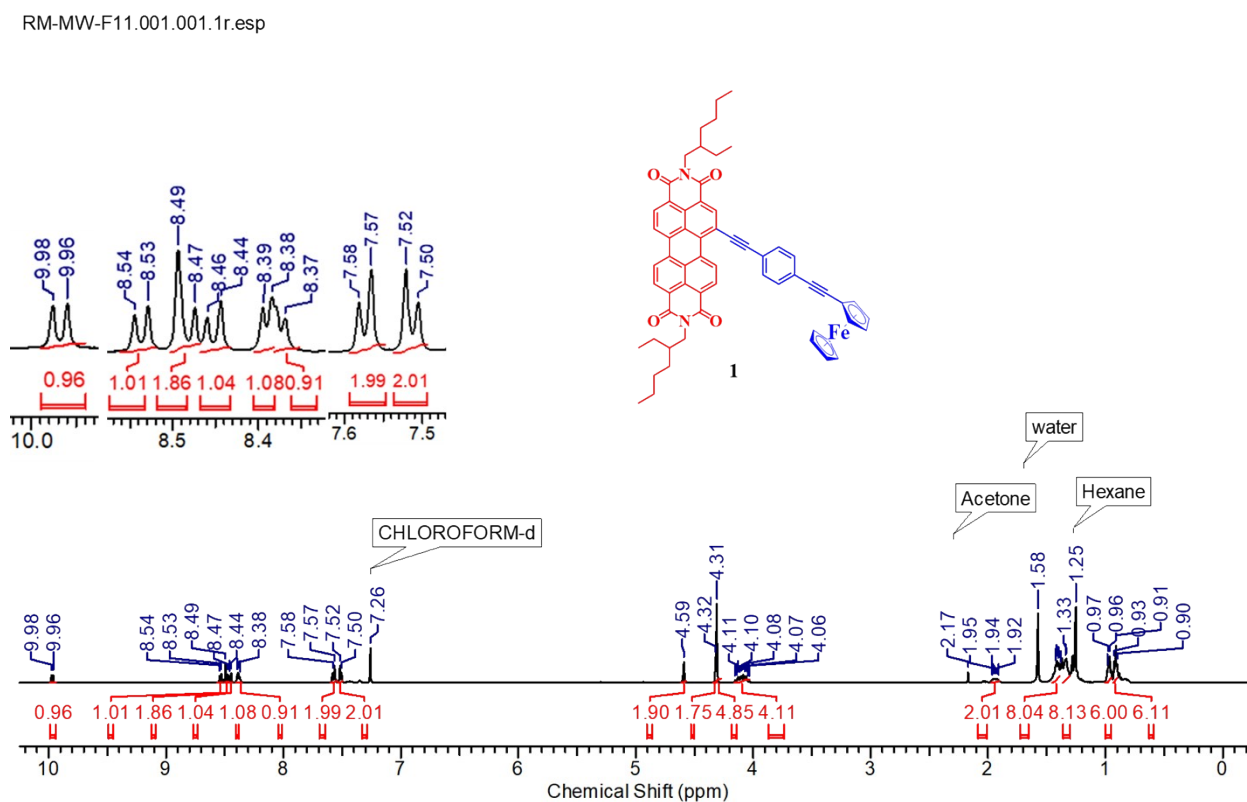

Figure S1.  $^1\text{H NMR}$  of compound 1.

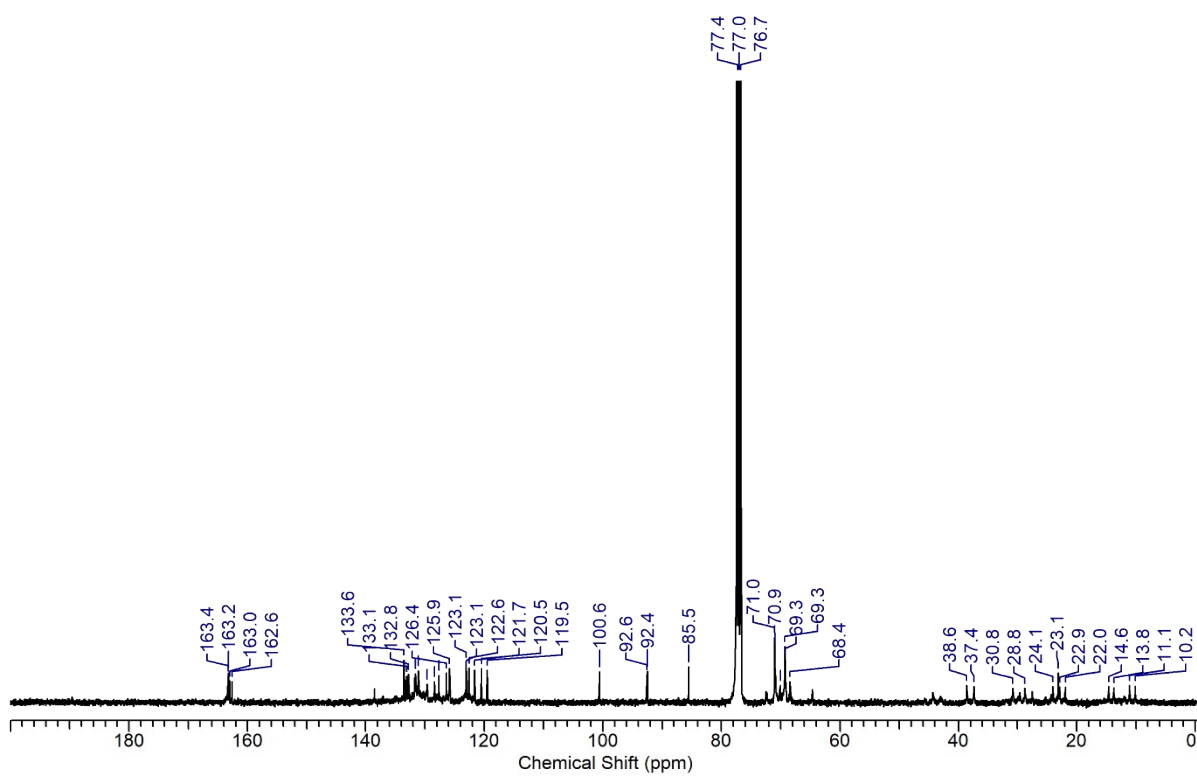

**Figure S2.**  $^{13}\text{C}$  NMR of compound 1.

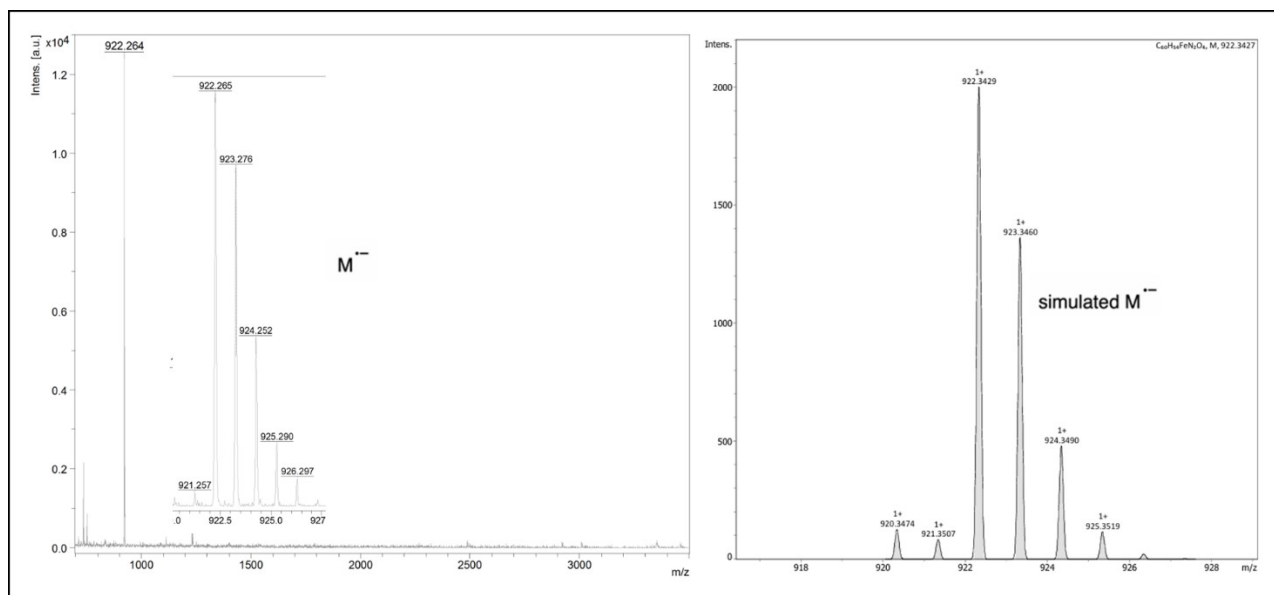

**Figure S3.** HRMS (MALDI-TOF) of compound 1.



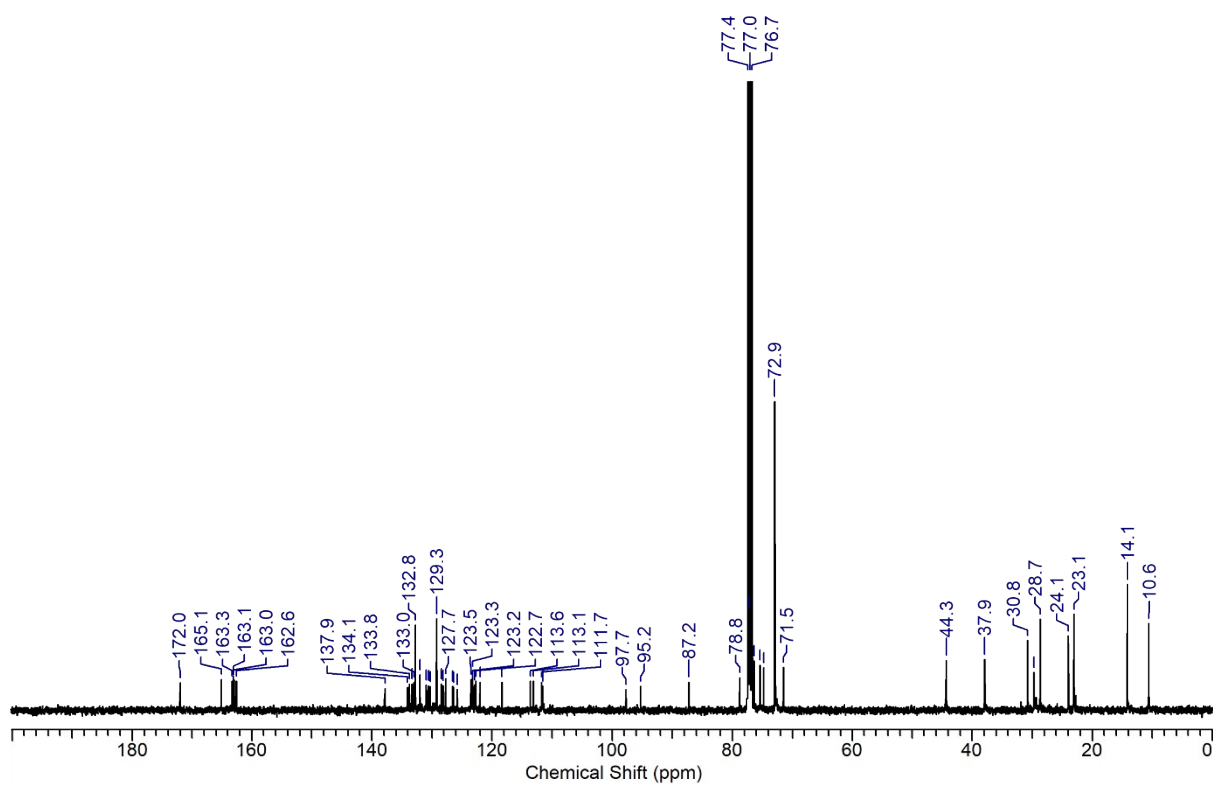

**Figure S5.** <sup>13</sup>C NMR of compound 2.

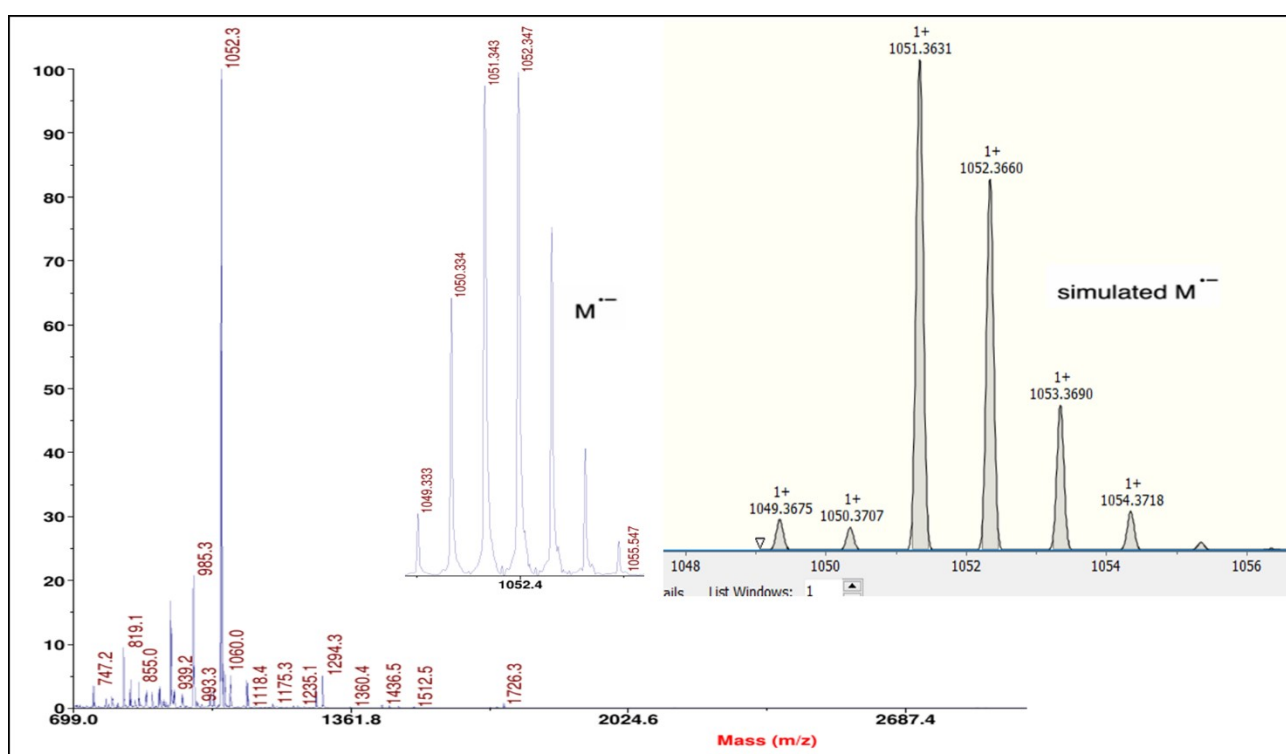

Figure S6. HRMS (MALDI-TOF) of compound 2.



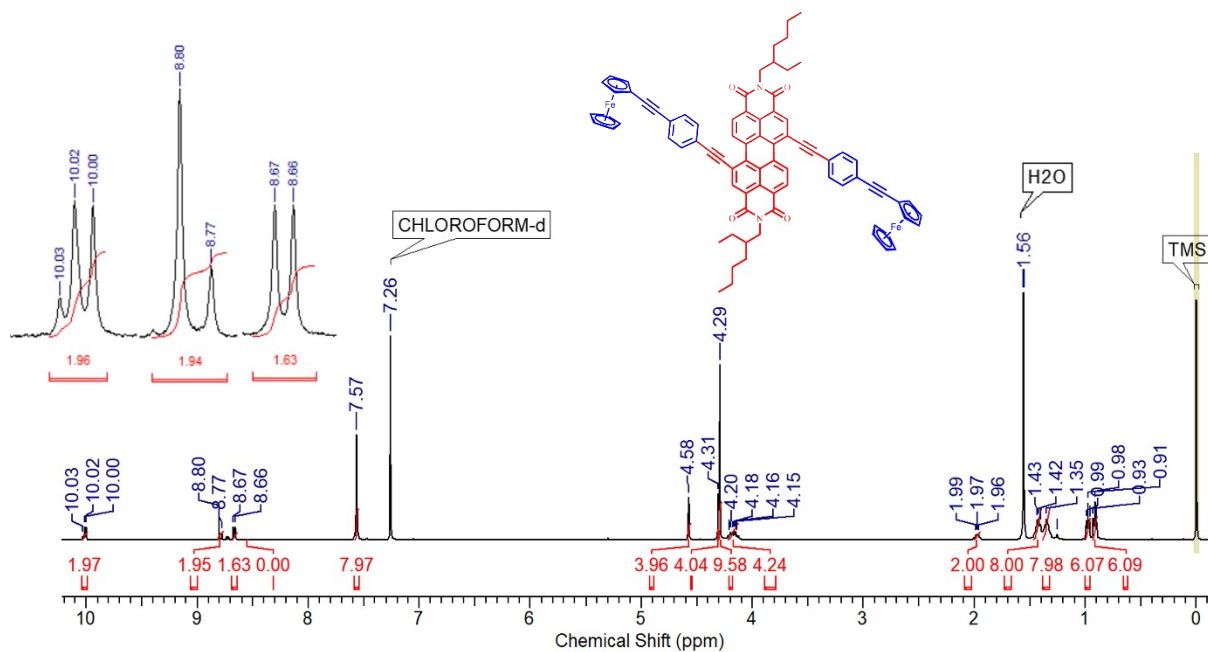

Figure S7.  $^1\text{H}$  NMR of compound 3.

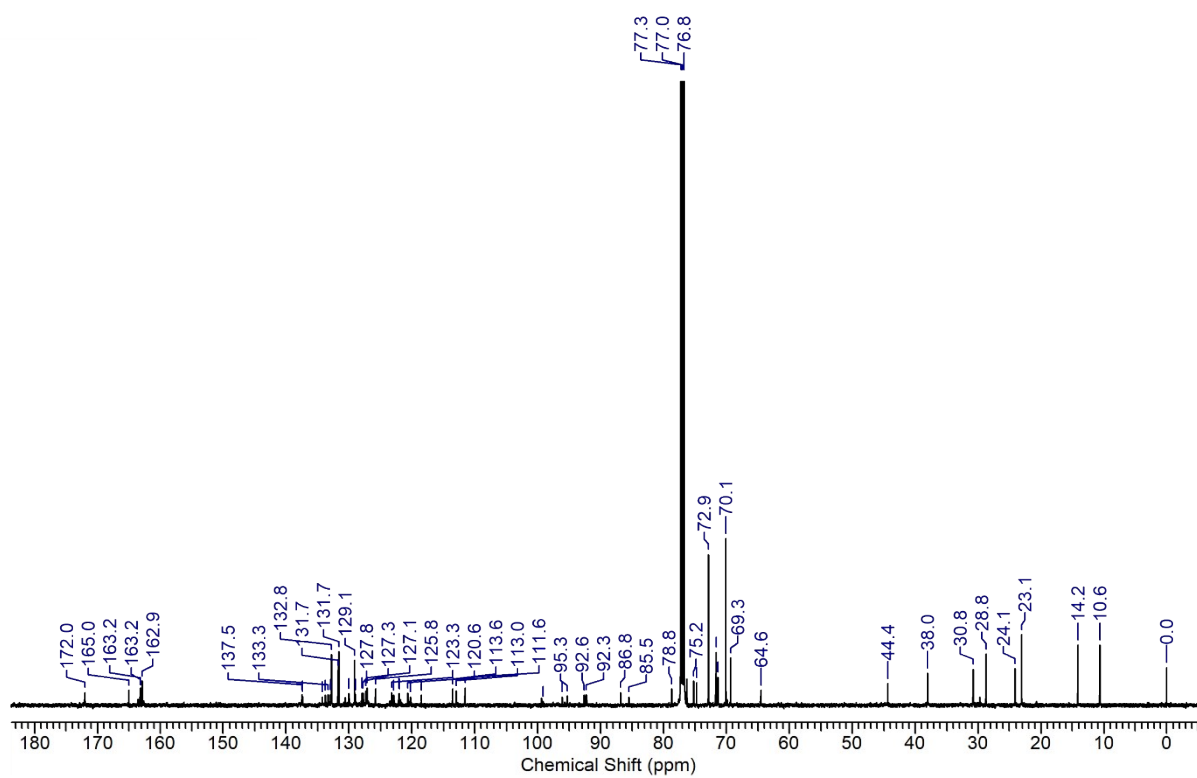

Figure S8.  $^{13}\text{C}$  NMR of compound **3**.

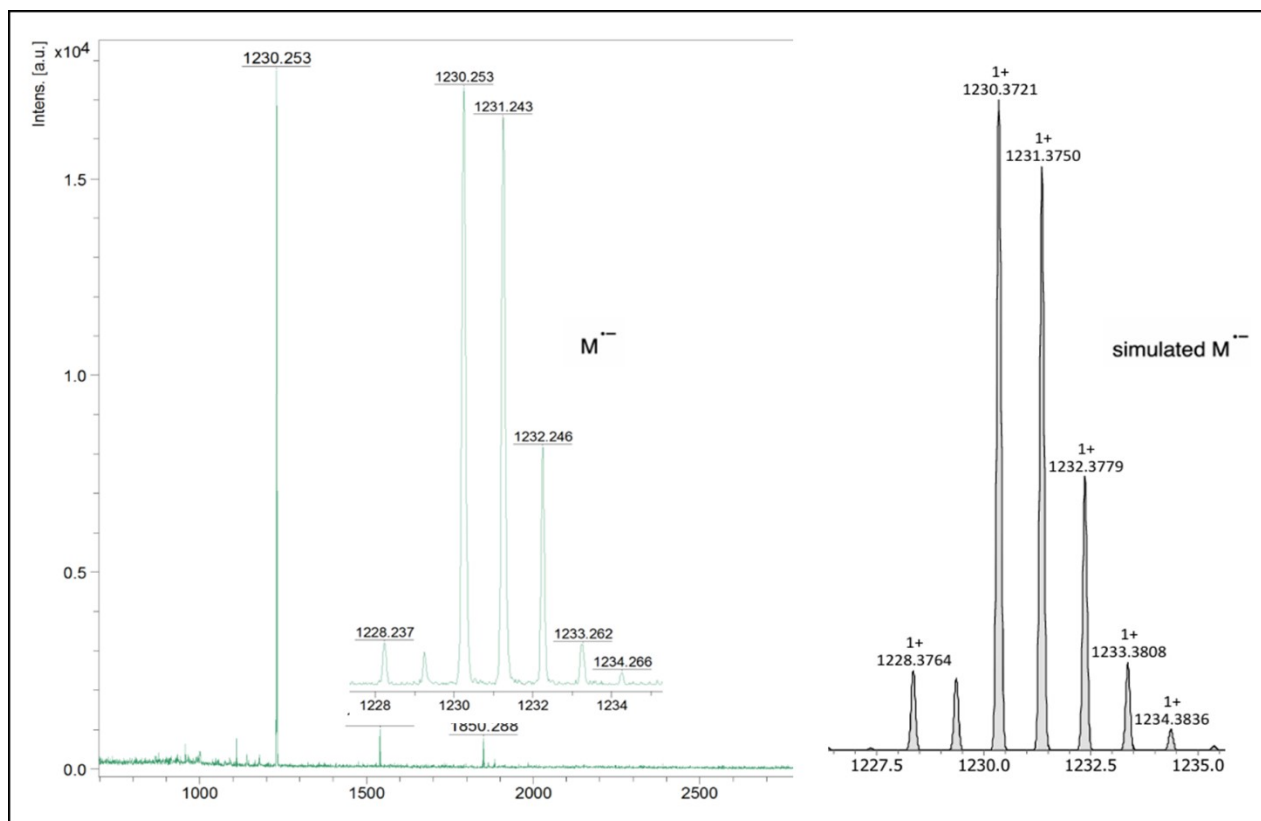

**Figure S9.** HRMS (MALDI-TOF) of compound **3**.

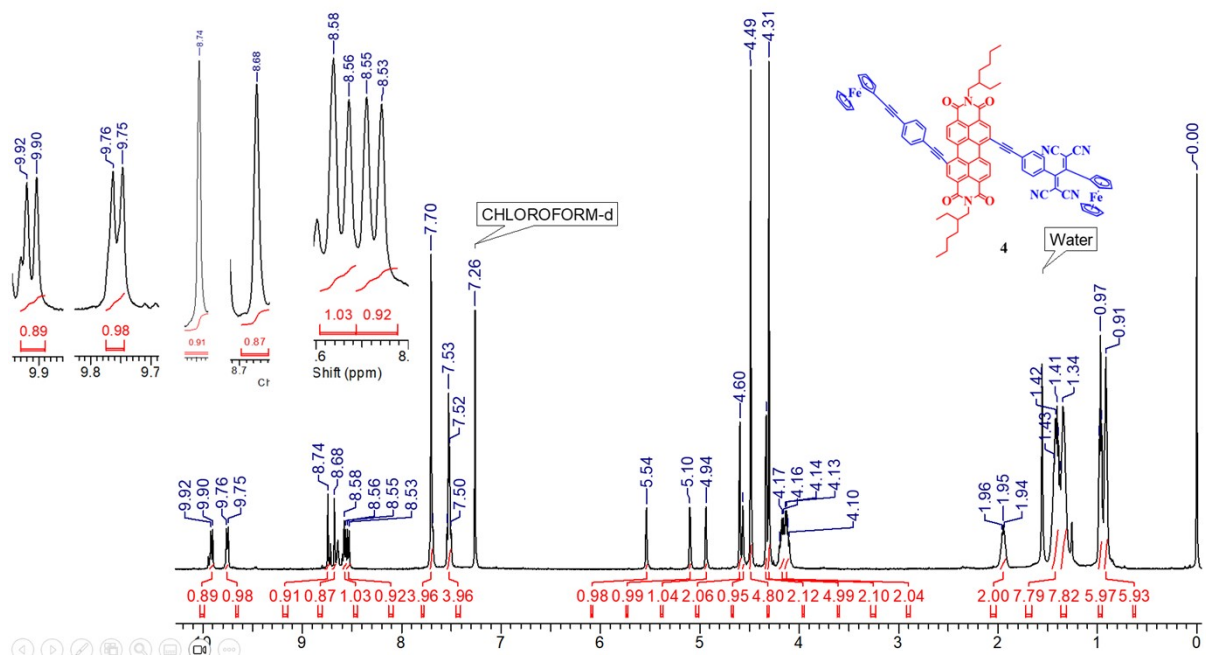

Figure S10. <sup>1</sup>H NMR of compound 4.

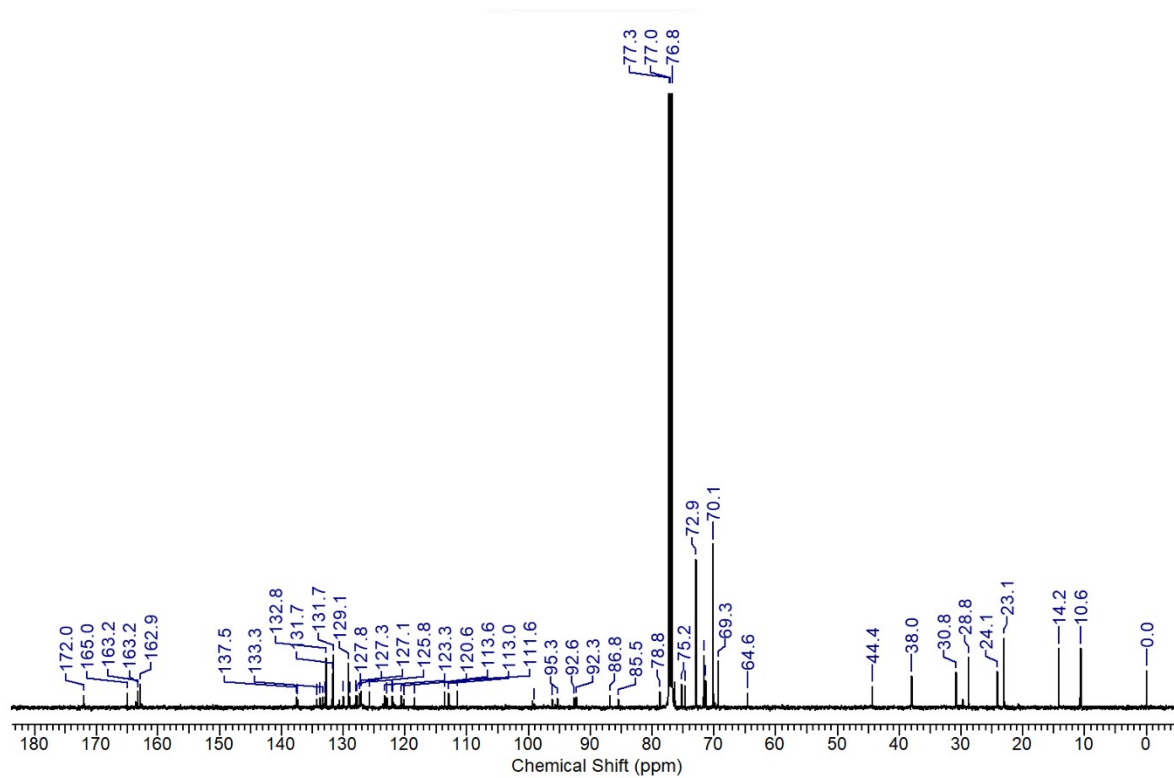

Figure S11.  $^{13}\text{C}$  NMR of compound 4.

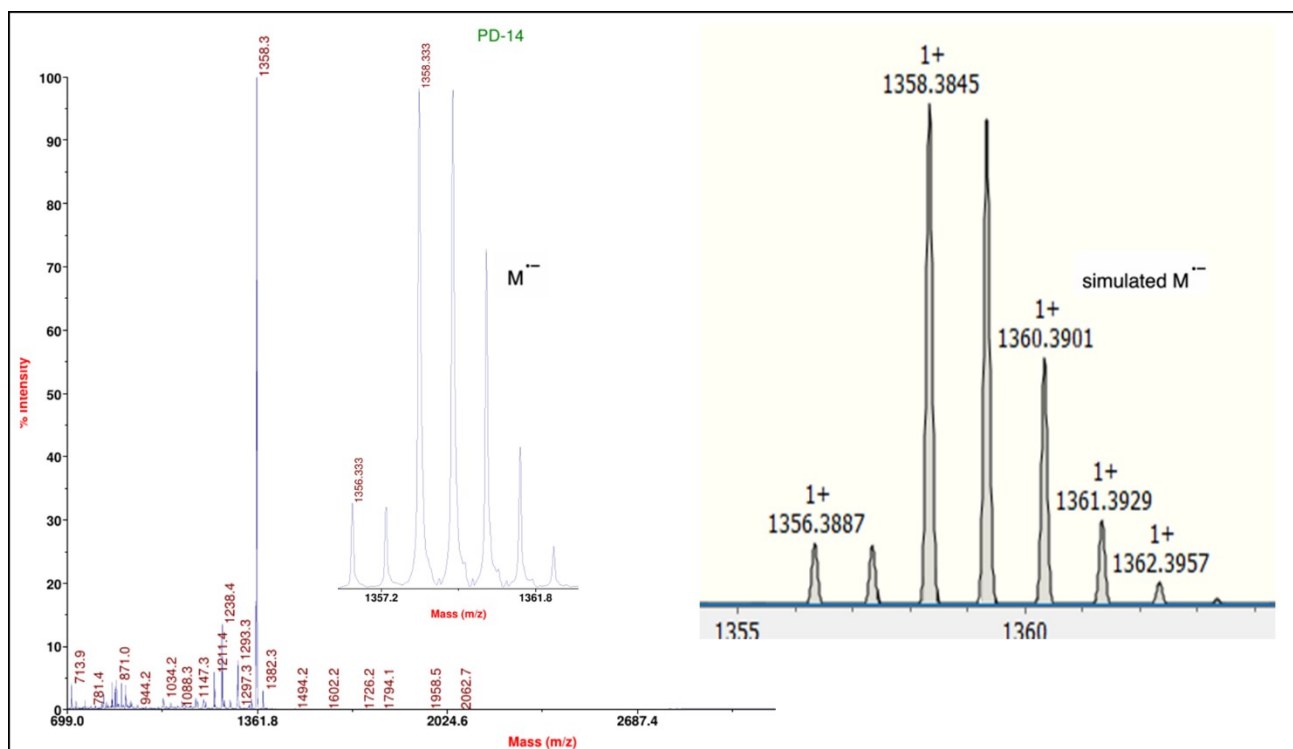

**Figure S12.** HRMS (MALDI-TOF) of compound 4.

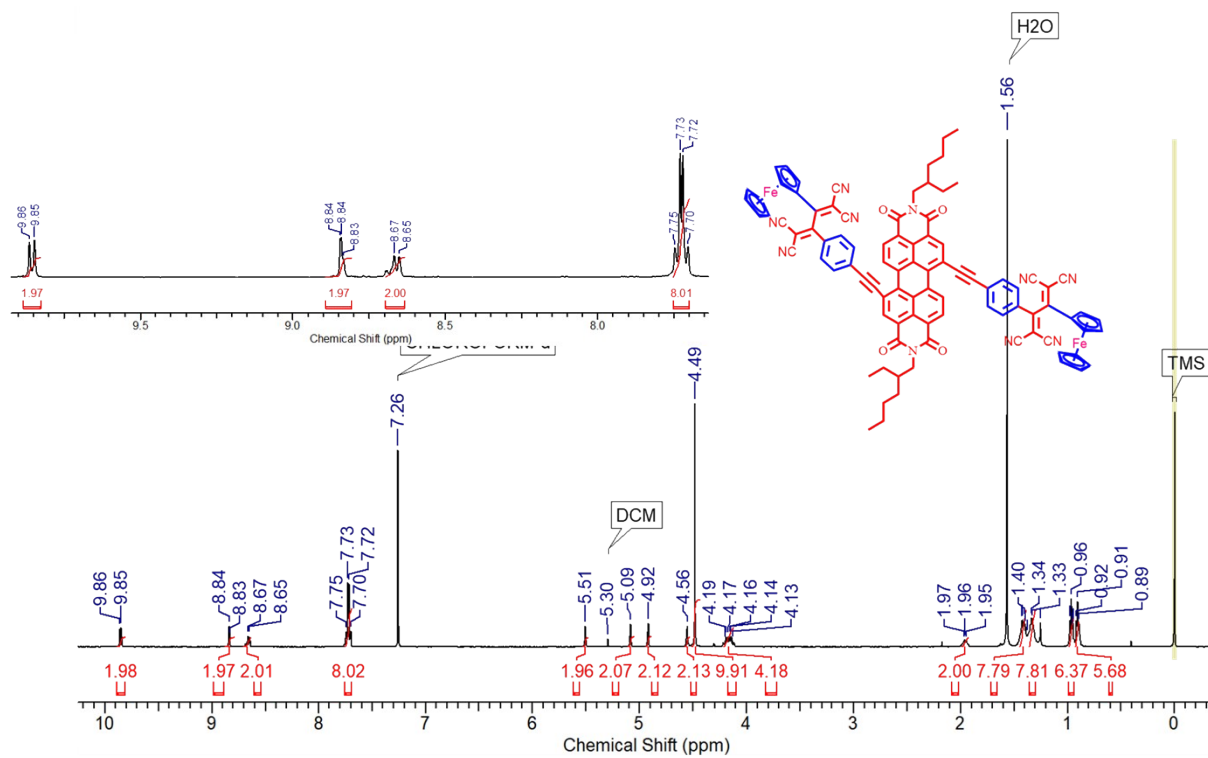

**Figure S13.**  $^1\text{H}$  NMR of compound **5**.

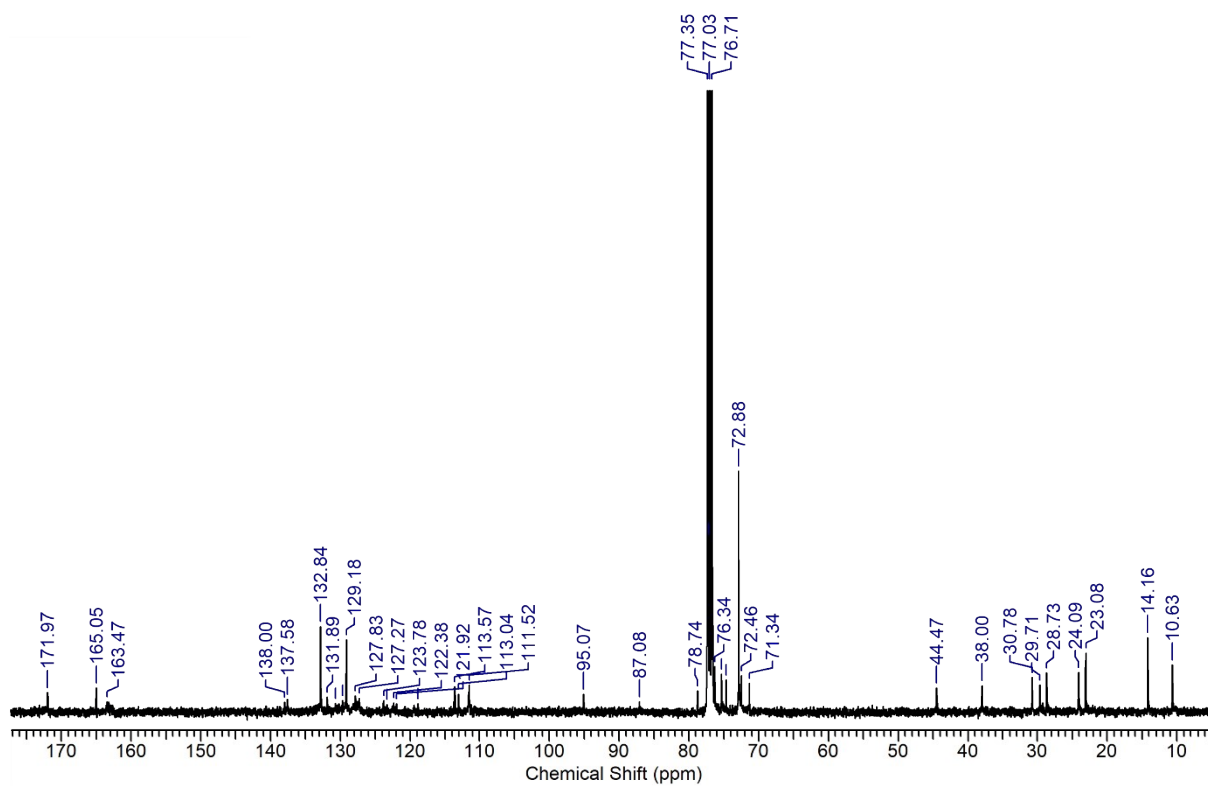

**Figure S14.** <sup>13</sup>C NMR of compound 5.



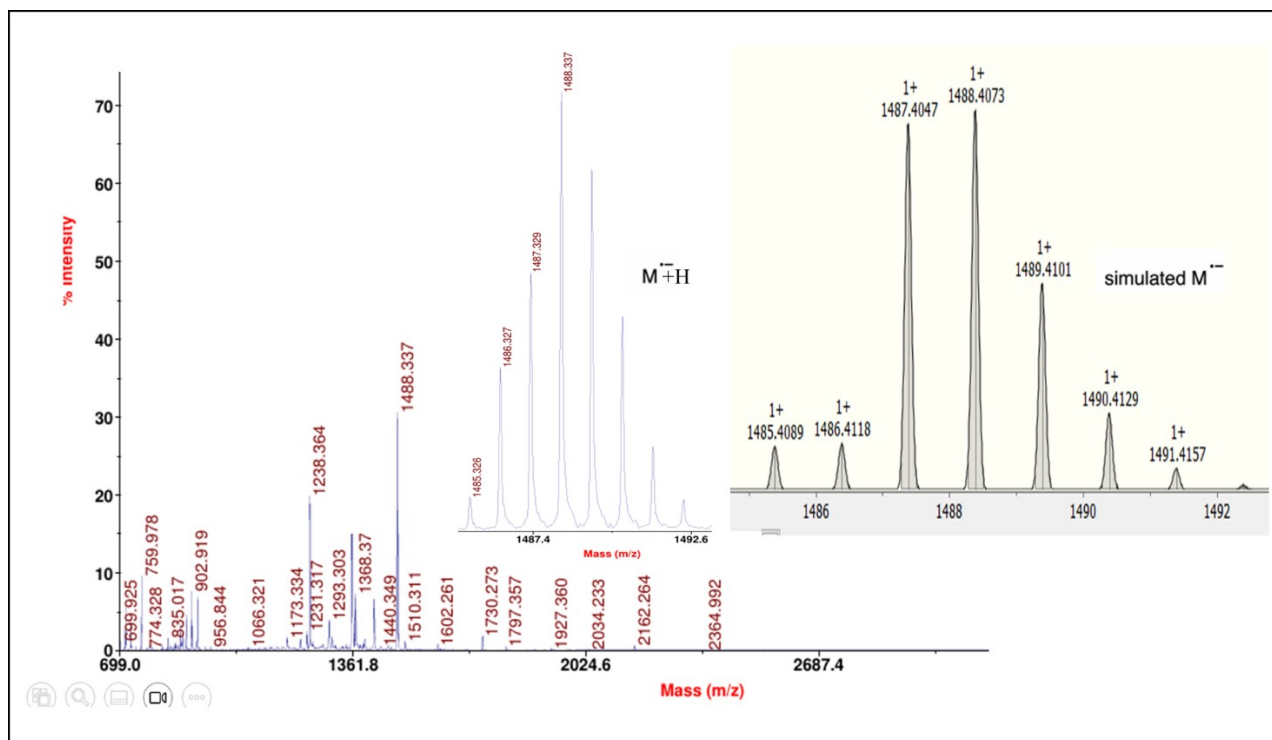

Figure S15. HRMS (MALDI-TOF) of compound 5.

## Photophysical Study

### Solvatochromic study:

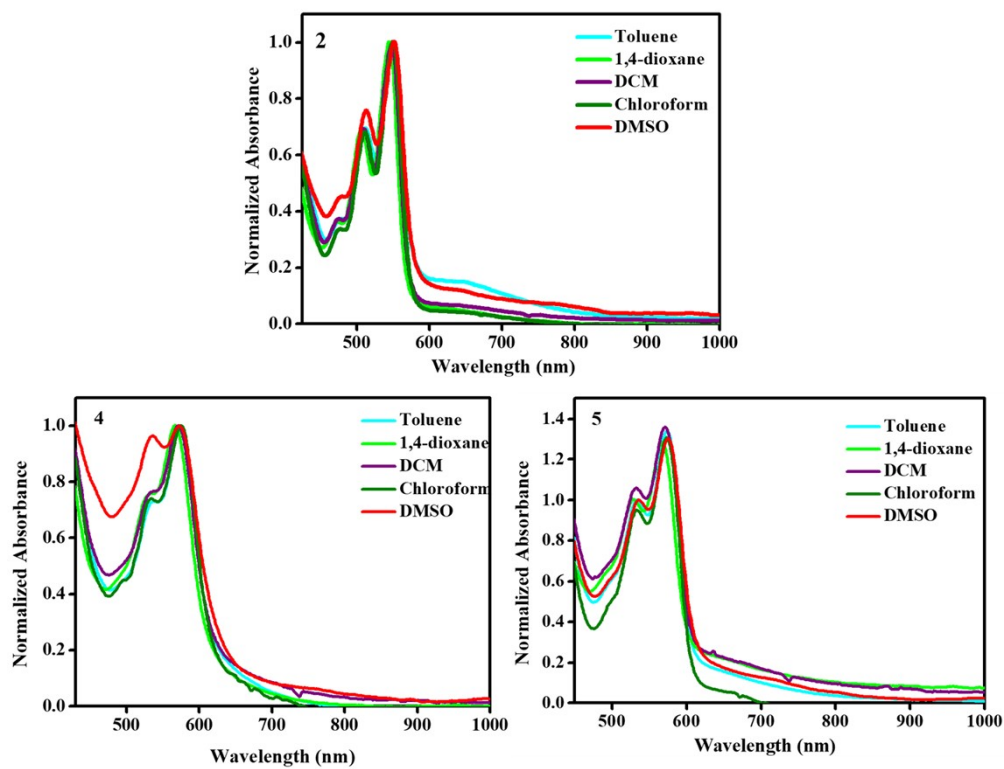

**Figure S16.** Absorption spectra of chromophores 1–5 in toluene to DMSO.

## Electrochemistry Study

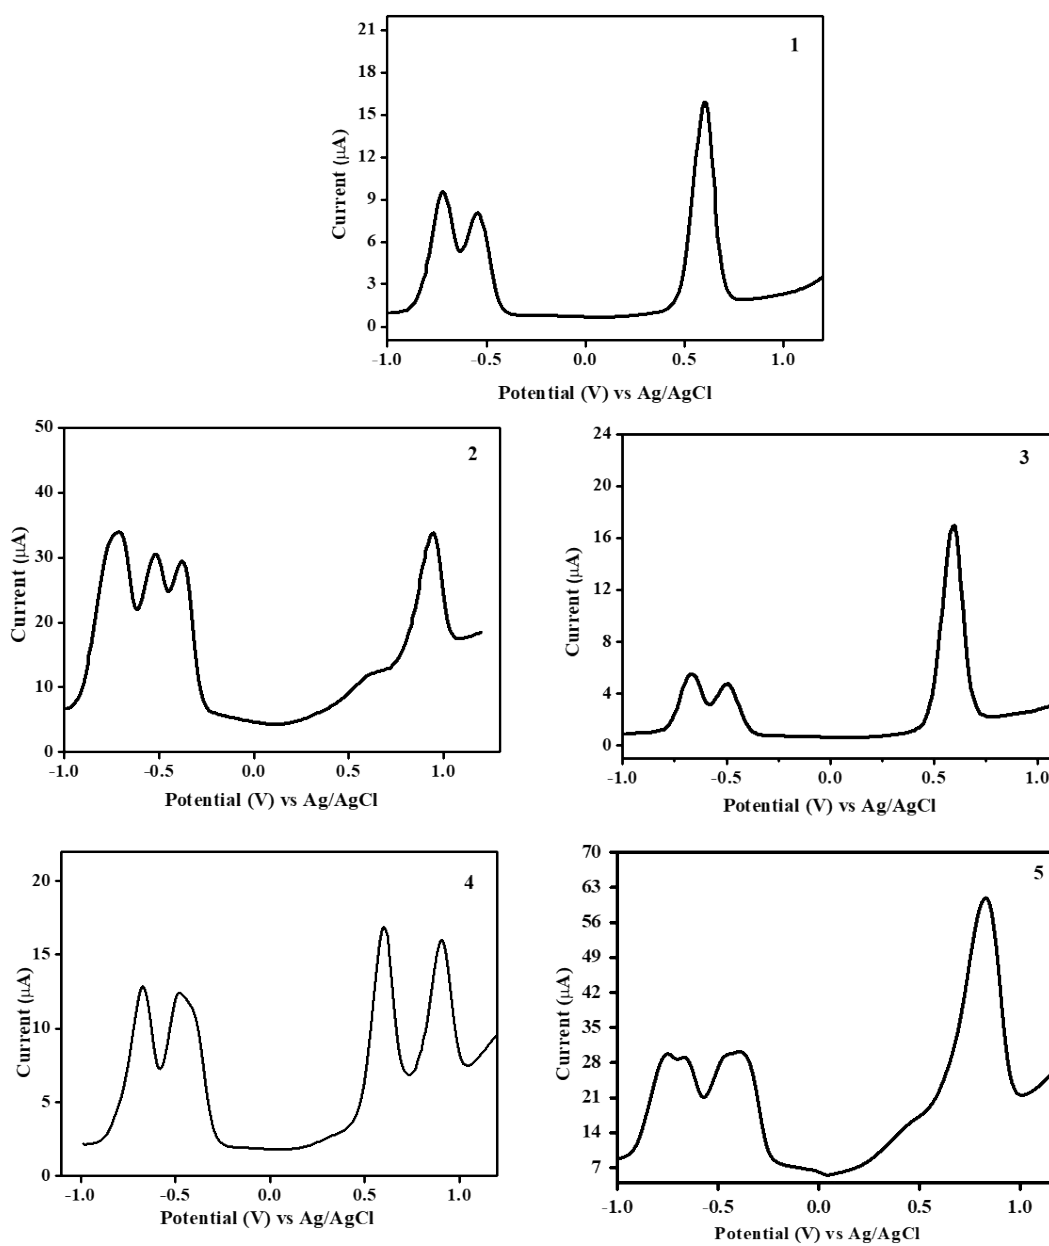

**Figure S17.** DPVs of donor-acceptor PDI derivatives 1–5.

**Table 1.** Redox properties of derivatives 1–5.

| <b>Compounds</b> | <b>wave</b> | <b><math>E_{1/2}</math></b><br><b>(V)</b> | <b><math>E_{pa}</math></b><br><b>(mV)</b> | <b><math>E_{pc}</math></b><br><b>(mV)</b> | <b><math>\Delta E_p</math></b><br><b>(mV)</b> | <b><math>E_{HOMO}</math></b><br><b>(eV)<sup>a</sup></b> | <b><math>E_{LUMO}</math></b><br><b>(eV)<sup>a</sup></b> | <b><math>E_g</math></b><br><b>(eV)<sup>a</sup></b> |
|------------------|-------------|-------------------------------------------|-------------------------------------------|-------------------------------------------|-----------------------------------------------|---------------------------------------------------------|---------------------------------------------------------|----------------------------------------------------|
| <b>1</b>         | i           | −0.50                                     | −460                                      | −539                                      | 79                                            | −5.04                                                   | −3.90                                                   | 1.14                                               |
|                  | ii          | −0.67                                     | −640                                      | −719                                      | 79                                            |                                                         |                                                         |                                                    |
|                  | iii         | 0.64                                      | 679                                       | 599                                       | 80                                            |                                                         |                                                         |                                                    |
| <b>2</b>         | i           | −0.29                                     | −319                                      | −389                                      | 70                                            | −5.36                                                   | −4.11                                                   | 1.25                                               |
|                  | ii          | −0.45                                     | −459                                      | −539                                      | 80                                            |                                                         |                                                         |                                                    |
|                  | iii         | −0.61                                     | −649                                      | −689                                      | 40                                            |                                                         |                                                         |                                                    |
|                  | iv          | −0.83                                     | −739                                      | −769                                      | 30                                            |                                                         |                                                         |                                                    |
|                  | v           | 0.96                                      | 999                                       | 919                                       | 80                                            |                                                         |                                                         |                                                    |
| <b>3</b>         | i           | −0.44                                     | −400                                      | −479                                      | 79                                            | −5.04                                                   | −3.96                                                   | 1.08                                               |
|                  | ii          | −0.62                                     | −579                                      | −659                                      | 80                                            |                                                         |                                                         |                                                    |
|                  | iii         | 0.64                                      | 609                                       | 679                                       | 70                                            |                                                         |                                                         |                                                    |
| <b>4</b>         | i           | −0.47                                     | −449                                      | −489                                      | 40                                            | −4.89                                                   | −3.93                                                   | 0.96                                               |
|                  | ii          | −0.57                                     | −529                                      | −609                                      | 80                                            |                                                         |                                                         |                                                    |
|                  | iii         | −0.75                                     | −719                                      | −779                                      | 60                                            |                                                         |                                                         |                                                    |
|                  | iv          | −0.85                                     | −829                                      | −869                                      | 40                                            |                                                         |                                                         |                                                    |
|                  | v           | 0.49                                      | 529                                       | 459                                       | 70                                            |                                                         |                                                         |                                                    |
|                  | vi          | 0.83                                      | 869                                       | 789                                       | 80                                            |                                                         |                                                         |                                                    |
| <b>5</b>         | i           | −0.34                                     | −309                                      | −379                                      | 70                                            | −5.05                                                   | −4.06                                                   | 0.99                                               |
|                  | ii          | −0.46                                     | −429                                      | −489                                      | 70                                            |                                                         |                                                         |                                                    |
|                  | iii         | −0.64                                     | −609                                      | −669                                      | 60                                            |                                                         |                                                         |                                                    |
|                  | iv          | −0.76                                     | −719                                      | −799                                      | 80                                            |                                                         |                                                         |                                                    |

|  |   |      |     |     |    |  |  |  |
|--|---|------|-----|-----|----|--|--|--|
|  | v | 0.96 | 999 | 919 | 80 |  |  |  |
|--|---|------|-----|-----|----|--|--|--|

PDI derivatives **1–5** in 0.1 M solution of (TBA)ClO<sub>4</sub> as the supporting electrolyte in dichloromethane at 100 mV s<sup>-1</sup> scan rate *versus* Ag/AgCl at 25 °C.  $E_g = - (E_{\text{HOMO}} - E_{\text{LUMO}})$ ,  $E_{1/2}$  calculated by  $(E_{\text{pa}} + E_{\text{pc}}) / 2$  and  $\Delta E_p = E_{\text{pa}} - E_{\text{pc}}$ .

## Spectroelectrochemistry Study

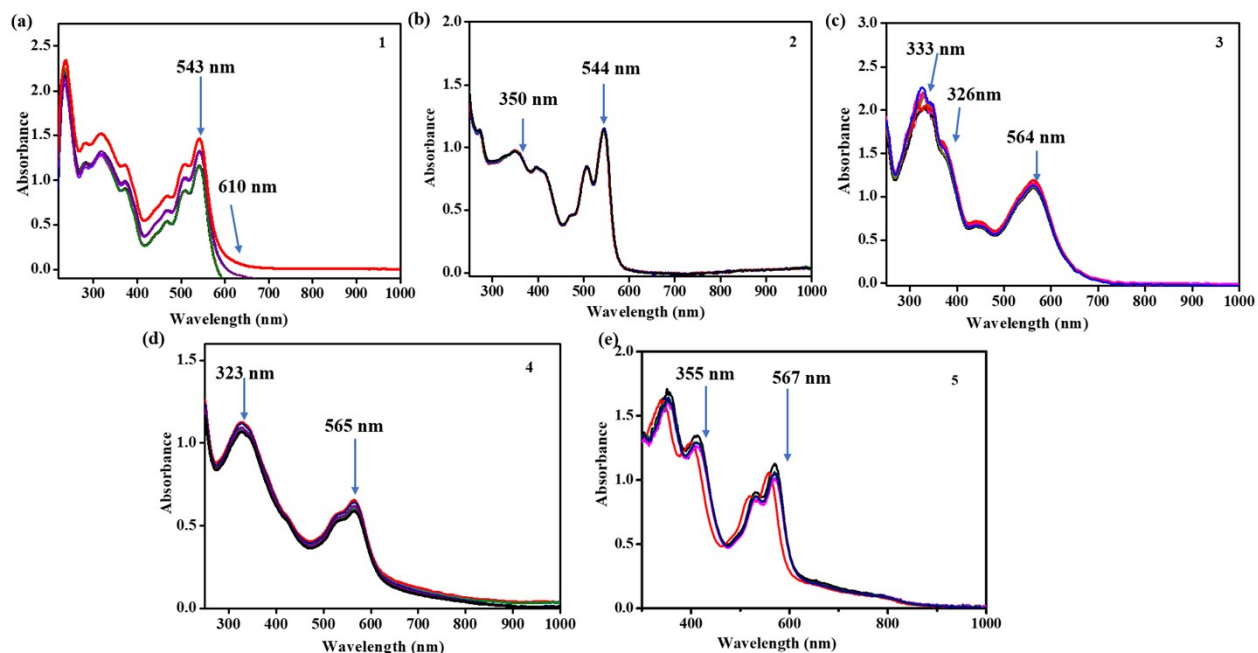

**Figure S18.** Oxidation of the PDI derivatives **1–5** under Spectroelectrochemical conditions in a DCM/0.50 M TBAPF<sub>6</sub> system. Spectroelectrochemical changes were observed (a) for **1**, (b) for **2**, (c) for **3**, (d), for **4**, and (e) for **5** in oxidation cycles. initial spectrum: black.

**Molecular electrostatic potential map.**

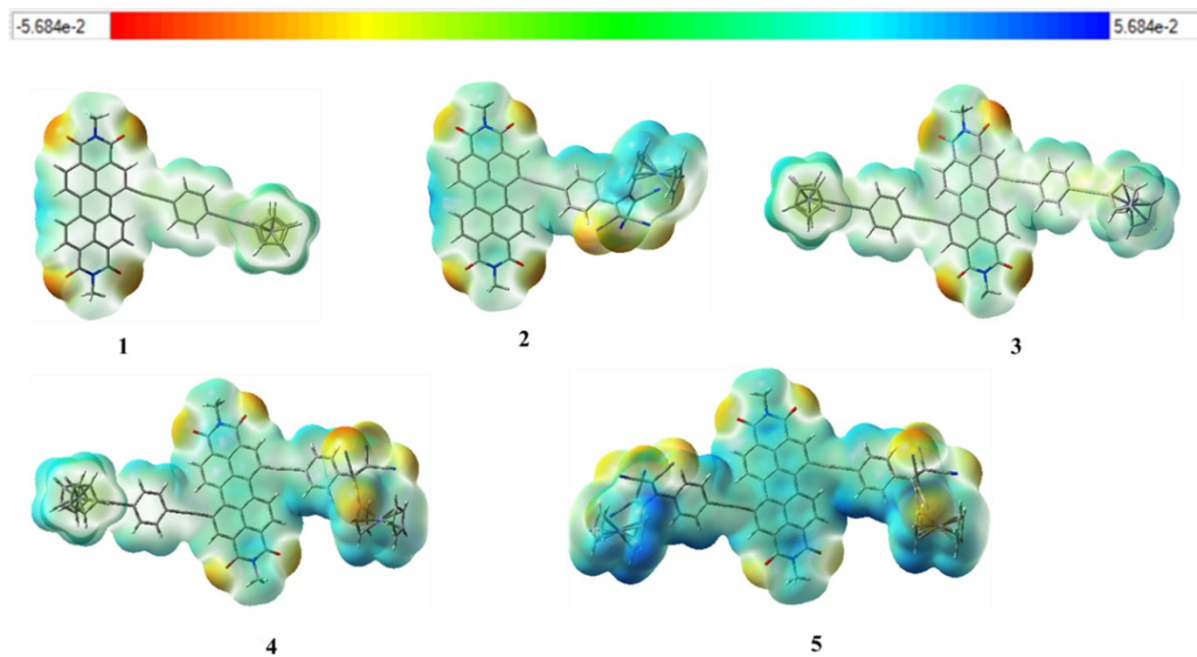

**Fig. S19** Molecular electrostatic potential (MEP) map of PDI compounds 1–5.

## TDOS spectrum

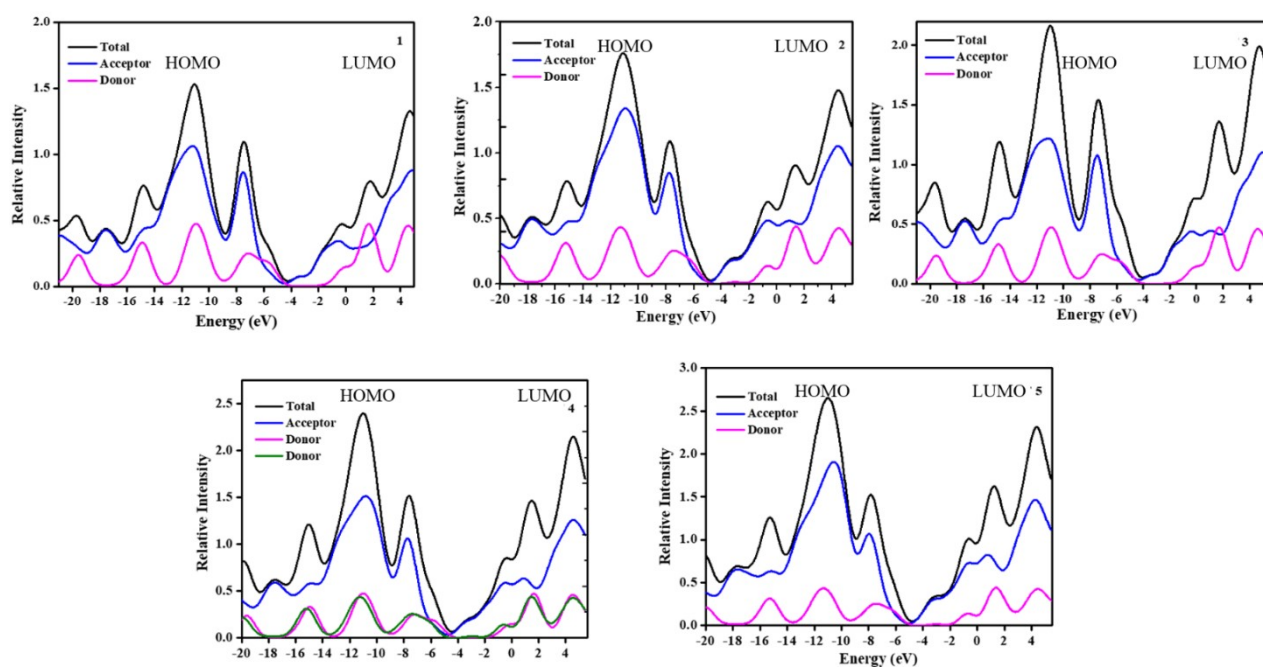

**Fig. S20** Density of state (DOS) analysis of the PDI derivatives **1–5**.



**DFT calculation:**

The computational study was performed by using the Gaussian 09W program<sup>1</sup>

**DFT of compound (1)**

Standard orientation:

| -----  |        |        |                         |           |           |  |
|--------|--------|--------|-------------------------|-----------|-----------|--|
| Center | Atomic | Atomic | Coordinates (Angstroms) |           |           |  |
| Number | Number | Type   | X                       | Y         | Z         |  |
| -----  |        |        |                         |           |           |  |
| 1      | 6      | 0      | 7.661529                | -2.279659 | 0.613213  |  |
| 2      | 6      | 0      | 7.455888                | -0.900162 | 0.650832  |  |
| 3      | 6      | 0      | 6.202721                | -0.329779 | 0.408282  |  |
| 4      | 6      | 0      | 5.101801                | -1.184040 | 0.074012  |  |
| 5      | 6      | 0      | 5.320736                | -2.596723 | 0.080586  |  |
| 6      | 6      | 0      | 6.602103                | -3.130236 | 0.342807  |  |
| 7      | 6      | 0      | 3.804082                | -0.654032 | -0.242732 |  |
| 8      | 6      | 0      | 2.731727                | -1.571810 | -0.405303 |  |
| 9      | 6      | 0      | 2.983414                | -2.970102 | -0.382273 |  |
| 10     | 6      | 0      | 4.240904                | -3.479188 | -0.171800 |  |
| 11     | 6      | 0      | 5.988394                | 1.117591  | 0.495564  |  |
| 12     | 6      | 0      | 4.741640                | 1.652039  | 0.052022  |  |
| 13     | 6      | 0      | 3.667434                | 0.804400  | -0.379560 |  |
| 14     | 6      | 0      | 6.966778                | 1.992710  | 0.976226  |  |
| 15     | 6      | 0      | 6.773900                | 3.376424  | 0.988696  |  |
| 16     | 6      | 0      | 5.597445                | 3.921320  | 0.502345  |  |
| 17     | 6      | 0      | 4.572229                | 3.071268  | 0.023055  |  |
| 18     | 6      | 0      | 3.383340                | 3.637512  | -0.497694 |  |

|    |   |   |           |           |           |
|----|---|---|-----------|-----------|-----------|
| 19 | 6 | 0 | 2.398433  | 2.805366  | -0.997546 |
| 20 | 6 | 0 | 2.538615  | 1.414295  | -0.936424 |
| 21 | 6 | 0 | 4.430160  | -4.952832 | -0.181176 |
| 22 | 7 | 0 | 5.729410  | -5.414793 | 0.071264  |
| 23 | 6 | 0 | 6.834297  | -4.594109 | 0.331719  |
| 24 | 6 | 0 | 5.428941  | 5.393532  | 0.492086  |
| 25 | 7 | 0 | 4.230357  | 5.893696  | -0.031659 |
| 26 | 6 | 0 | 3.184802  | 5.106586  | -0.538828 |
| 27 | 8 | 0 | 3.507651  | -5.727261 | -0.396200 |
| 28 | 8 | 0 | 7.933707  | -5.090342 | 0.538924  |
| 29 | 8 | 0 | 6.284051  | 6.160973  | 0.914973  |
| 30 | 8 | 0 | 2.165456  | 5.614618  | -0.987827 |
| 31 | 6 | 0 | 1.358562  | -1.233471 | -0.545165 |
| 32 | 6 | 0 | 0.147906  | -1.107569 | -0.622247 |
| 33 | 6 | 0 | -1.253806 | -0.900112 | -0.709499 |
| 34 | 6 | 0 | 5.976835  | -6.860907 | 0.069420  |
| 35 | 6 | 0 | 4.082037  | 7.353049  | -0.041016 |
| 36 | 6 | 0 | -2.122241 | -1.968710 | -1.018830 |
| 37 | 6 | 0 | -3.490642 | -1.765890 | -1.100993 |
| 38 | 6 | 0 | -4.046372 | -0.487941 | -0.874190 |
| 39 | 6 | 0 | -3.176266 | 0.580281  | -0.565008 |
| 40 | 6 | 0 | -1.807782 | 0.378728  | -0.484250 |
| 41 | 6 | 0 | -5.449869 | -0.281409 | -0.949527 |
| 42 | 1 | 0 | 8.639836  | -2.707866 | 0.800788  |
| 43 | 1 | 0 | 8.304974  | -0.264029 | 0.867771  |
| 44 | 1 | 0 | 2.160300  | -3.658511 | -0.532339 |
| 45 | 1 | 0 | 7.903315  | 1.605276  | 1.357813  |
| 46 | 1 | 0 | 7.540503  | 4.045298  | 1.363963  |
| 47 | 1 | 0 | 1.510444  | 3.253097  | -1.430207 |
| 48 | 1 | 0 | 1.744766  | 0.804392  | -1.338598 |

|    |    |   |            |           |           |
|----|----|---|------------|-----------|-----------|
| 49 | 1  | 0 | 5.028879   | -7.358328 | -0.118067 |
| 50 | 1  | 0 | 6.702690   | -7.111511 | -0.707048 |
| 51 | 1  | 0 | 6.389180   | -7.164777 | 1.033439  |
| 52 | 1  | 0 | 4.890319   | 7.802448  | -0.621365 |
| 53 | 1  | 0 | 3.116727   | 7.584403  | -0.483692 |
| 54 | 1  | 0 | 4.139868   | 7.737466  | 0.979435  |
| 55 | 1  | 0 | -1.706454  | -2.955481 | -1.193448 |
| 56 | 1  | 0 | -4.150040  | -2.593341 | -1.340176 |
| 57 | 1  | 0 | -3.592449  | 1.566375  | -0.388743 |
| 58 | 1  | 0 | -1.149727  | 1.206021  | -0.239471 |
| 59 | 6  | 0 | -6.652452  | -0.102603 | -1.012088 |
| 60 | 6  | 0 | -8.050722  | 0.112372  | -1.093904 |
| 61 | 26 | 0 | -9.439023  | -0.087124 | 0.410605  |
| 62 | 6  | 0 | -8.739027  | 1.357175  | -0.860504 |
| 63 | 6  | 0 | -9.049905  | -0.866779 | -1.441837 |
| 64 | 6  | 0 | -8.446687  | -0.750587 | 2.081324  |
| 65 | 6  | 0 | -9.494040  | -1.655569 | 1.735530  |
| 66 | 6  | 0 | -9.030191  | 0.528429  | 2.326446  |
| 67 | 6  | 0 | -10.726816 | -0.935677 | 1.766710  |
| 68 | 6  | 0 | -10.440120 | 0.413870  | 2.132269  |
| 69 | 6  | 0 | -10.128004 | 1.144719  | -1.083258 |
| 70 | 6  | 0 | -10.319497 | -0.224268 | -1.441329 |
| 71 | 1  | 0 | -8.264274  | 2.285976  | -0.577490 |
| 72 | 1  | 0 | -8.850279  | -1.903466 | -1.673320 |
| 73 | 1  | 0 | -7.391002  | -0.983282 | 2.115986  |
| 74 | 1  | 0 | -9.373685  | -2.700138 | 1.482800  |
| 75 | 1  | 0 | -8.496732  | 1.428622  | 2.599450  |
| 76 | 1  | 0 | -11.704866 | -1.339664 | 1.543495  |
| 77 | 1  | 0 | -11.163321 | 1.211483  | 2.234820  |
| 78 | 1  | 0 | -10.905515 | 1.889680  | -0.984212 |

79      1      0    -11.267426   -0.696119   -1.660494

-----  
Rotational constants (GHZ):    0.0630221    0.0167274    0.0136357

## DFT of compound (2)

Standard orientation:

-----

| Center | Atomic | Atomic | Coordinates (Angstroms) |           |           |
|--------|--------|--------|-------------------------|-----------|-----------|
| Number | Number | Type   | X                       | Y         | Z         |
| 1      | 6      | 0      | 8.174211                | 3.024703  | -0.178107 |
| 2      | 6      | 0      | 8.182707                | 1.629598  | -0.227138 |
| 3      | 6      | 0      | 7.006929                | 0.878410  | -0.151440 |
| 4      | 6      | 0      | 5.757748                | 1.559475  | 0.019686  |
| 5      | 6      | 0      | 5.762434                | 2.988938  | 0.020058  |
| 6      | 6      | 0      | 6.974812                | 3.709373  | -0.068710 |
| 7      | 6      | 0      | 4.522693                | 0.841455  | 0.167736  |
| 8      | 6      | 0      | 3.314825                | 1.588237  | 0.154698  |
| 9      | 6      | 0      | 3.353031                | 3.007656  | 0.139964  |
| 10     | 6      | 0      | 4.539167                | 3.698367  | 0.102610  |
| 11     | 6      | 0      | 7.019067                | -0.583976 | -0.250176 |
| 12     | 6      | 0      | 5.819110                | -1.297608 | 0.044505  |
| 13     | 6      | 0      | 4.587298                | -0.619679 | 0.325922  |
| 14     | 6      | 0      | 8.166123                | -1.303642 | -0.595016 |
| 15     | 6      | 0      | 8.180512                | -2.701532 | -0.610095 |
| 16     | 6      | 0      | 7.047003                | -3.414325 | -0.258316 |
| 17     | 6      | 0      | 5.858148                | -2.725314 | 0.080760  |
| 18     | 6      | 0      | 4.712788                | -3.460288 | 0.471683  |
| 19     | 6      | 0      | 3.564477                | -2.784054 | 0.840172  |

|    |   |   |           |           |           |
|----|---|---|-----------|-----------|-----------|
| 20 | 6 | 0 | 3.504473  | -1.387026 | 0.765973  |
| 21 | 6 | 0 | 4.512650  | 5.182382  | 0.112636  |
| 22 | 7 | 0 | 5.746623  | 5.836312  | 0.044800  |
| 23 | 6 | 0 | 6.991612  | 5.193383  | -0.046694 |
| 24 | 6 | 0 | 7.096049  | -4.896649 | -0.241090 |
| 25 | 7 | 0 | 5.931173  | -5.568297 | 0.148973  |
| 26 | 6 | 0 | 4.730679  | -4.944277 | 0.520054  |
| 27 | 8 | 0 | 3.472937  | 5.824140  | 0.177678  |
| 28 | 8 | 0 | 8.033492  | 5.831722  | -0.105450 |
| 29 | 8 | 0 | 8.099031  | -5.527103 | -0.547718 |
| 30 | 6 | 0 | 2.004592  | 1.038681  | 0.093556  |
| 31 | 6 | 0 | 0.833729  | 0.715527  | -0.006730 |
| 32 | 6 | 0 | -0.509846 | 0.272099  | -0.119927 |
| 33 | 6 | 0 | 5.710579  | 7.303261  | 0.064139  |
| 34 | 6 | 0 | 5.998756  | -7.034161 | 0.168495  |
| 35 | 6 | 0 | -1.584324 | 1.152882  | 0.124823  |
| 36 | 6 | 0 | -2.893892 | 0.710493  | 0.028965  |
| 37 | 6 | 0 | -3.183626 | -0.619140 | -0.344955 |
| 38 | 6 | 0 | -2.107106 | -1.500827 | -0.575503 |
| 39 | 6 | 0 | -0.796447 | -1.065313 | -0.464589 |
| 40 | 1 | 0 | 9.095620  | 3.593409  | -0.234138 |
| 41 | 1 | 0 | 9.138126  | 1.127880  | -0.317719 |
| 42 | 1 | 0 | 2.424284  | 3.565734  | 0.156024  |
| 43 | 1 | 0 | 9.075804  | -0.780881 | -0.864255 |
| 44 | 1 | 0 | 9.076534  | -3.249388 | -0.880024 |
| 45 | 1 | 0 | 2.709477  | -3.358117 | 1.180134  |
| 46 | 1 | 0 | 2.589706  | -0.900404 | 1.067731  |
| 47 | 1 | 0 | 5.133913  | 7.669903  | -0.787502 |
| 48 | 1 | 0 | 5.225839  | 7.647792  | 0.979686  |
| 49 | 1 | 0 | 6.736055  | 7.659656  | 0.014604  |

|    |    |   |            |           |           |
|----|----|---|------------|-----------|-----------|
| 50 | 1  | 0 | 6.777092   | -7.359013 | 0.861959  |
| 51 | 1  | 0 | 5.026972   | -7.406152 | 0.482280  |
| 52 | 1  | 0 | 6.250991   | -7.404660 | -0.826988 |
| 53 | 1  | 0 | -1.376931  | 2.182258  | 0.395712  |
| 54 | 1  | 0 | -3.700973  | 1.407151  | 0.223114  |
| 55 | 1  | 0 | -2.295085  | -2.541836 | -0.806039 |
| 56 | 1  | 0 | 0.019711   | -1.758408 | -0.635968 |
| 57 | 6  | 0 | -4.577947  | -1.084630 | -0.431503 |
| 58 | 6  | 0 | -5.025385  | -2.021268 | -1.327800 |
| 59 | 6  | 0 | -5.665132  | -1.116710 | 1.772590  |
| 60 | 6  | 0 | -4.231269  | -2.551565 | -2.398338 |
| 61 | 6  | 0 | -6.368920  | -2.521273 | -1.287828 |
| 62 | 6  | 0 | -4.873298  | -2.268405 | 2.086636  |
| 63 | 6  | 0 | -6.575209  | -0.696347 | 2.792939  |
| 64 | 7  | 0 | -3.637547  | -2.991646 | -3.296836 |
| 65 | 7  | 0 | -7.450759  | -2.949531 | -1.282724 |
| 66 | 7  | 0 | -4.225170  | -3.199225 | 2.347666  |
| 67 | 7  | 0 | -7.319492  | -0.374109 | 3.627912  |
| 68 | 8  | 0 | 3.752477   | -5.594151 | 0.862302  |
| 69 | 6  | 0 | -5.554691  | -0.493479 | 0.551769  |
| 70 | 6  | 0 | -6.215624  | 0.739368  | 0.149422  |
| 71 | 26 | 0 | -8.192382  | 1.138571  | -0.259385 |
| 72 | 6  | 0 | -6.737277  | 1.790757  | 1.003112  |
| 73 | 6  | 0 | -6.376257  | 1.194441  | -1.215497 |
| 74 | 6  | 0 | -9.342143  | -0.530843 | 0.125083  |
| 75 | 6  | 0 | -9.437892  | -0.170201 | -1.251101 |
| 76 | 6  | 0 | -9.790473  | 0.570691  | 0.909240  |
| 77 | 6  | 0 | -9.951614  | 1.159134  | -1.319489 |
| 78 | 6  | 0 | -10.168487 | 1.617638  | 0.014875  |
| 79 | 6  | 0 | -7.155034  | 2.863234  | 0.172465  |

|    |   |   |            |           |           |
|----|---|---|------------|-----------|-----------|
| 80 | 6 | 0 | -6.944241  | 2.493593  | -1.189796 |
| 81 | 1 | 0 | -6.764445  | 1.778079  | 2.081521  |
| 82 | 1 | 0 | -6.097703  | 0.641382  | -2.100934 |
| 83 | 1 | 0 | -8.962415  | -1.471118 | 0.498682  |
| 84 | 1 | 0 | -9.158582  | -0.799018 | -2.084257 |
| 85 | 1 | 0 | -9.811398  | 0.610862  | 1.989523  |
| 86 | 1 | 0 | -10.132964 | 1.726254  | -2.222507 |
| 87 | 1 | 0 | -10.539505 | 2.593156  | 0.298832  |
| 88 | 1 | 0 | -7.583372  | 3.793387  | 0.519515  |
| 89 | 1 | 0 | -7.192546  | 3.090423  | -2.056363 |

-----  
Rotational constants (GHZ): 0.0539441 0.0147663 0.0121130

### DFT of compound (3)

Standard orientation:

-----

| Center | Atomic | Atomic | Coordinates (Angstroms) |           |           |
|--------|--------|--------|-------------------------|-----------|-----------|
| Number | Number | Type   | X                       | Y         | Z         |
| 1      | 6      | 0      | 2.899851                | -2.140535 | -1.963312 |
| 2      | 6      | 0      | 2.663444                | -0.773084 | -1.808204 |
| 3      | 6      | 0      | 1.374554                | -0.255734 | -1.632389 |
| 4      | 6      | 0      | 0.261146                | -1.158546 | -1.713483 |
| 5      | 6      | 0      | 0.525267                | -2.560152 | -1.801848 |
| 6      | 6      | 0      | 1.848025                | -3.040854 | -1.925298 |
| 7      | 6      | 0      | -1.090547               | -0.685626 | -1.709482 |
| 8      | 6      | 0      | -2.139217               | -1.638496 | -1.597753 |

-----

|    |   |   |           |           |           |
|----|---|---|-----------|-----------|-----------|
| 9  | 6 | 0 | -1.839344 | -3.025328 | -1.639461 |
| 10 | 6 | 0 | -0.550228 | -3.481894 | -1.773096 |
| 11 | 6 | 0 | 1.126137  | 1.169091  | -1.392323 |
| 12 | 6 | 0 | -0.202970 | 1.653776  | -1.613759 |
| 13 | 6 | 0 | -1.301525 | 0.758866  | -1.845633 |
| 14 | 6 | 0 | 1.823712  | 3.481177  | -0.937241 |
| 15 | 6 | 0 | 0.581829  | 3.962456  | -1.275594 |
| 16 | 6 | 0 | -0.458077 | 3.059747  | -1.608645 |
| 17 | 6 | 0 | -1.735627 | 3.564277  | -1.939456 |
| 18 | 6 | 0 | -2.750944 | 2.683510  | -2.273705 |
| 19 | 6 | 0 | -2.536196 | 1.304896  | -2.215865 |
| 20 | 6 | 0 | -0.305787 | -4.942849 | -1.857074 |
| 21 | 7 | 0 | 1.024795  | -5.354722 | -1.990344 |
| 22 | 6 | 0 | 2.132149  | -4.492411 | -2.033607 |
| 23 | 6 | 0 | 0.344902  | 5.426955  | -1.258577 |
| 24 | 7 | 0 | -0.937246 | 5.864210  | -1.608899 |
| 25 | 6 | 0 | -2.006788 | 5.022291  | -1.953883 |
| 26 | 8 | 0 | -1.207183 | -5.769692 | -1.816336 |
| 27 | 8 | 0 | 3.270343  | -4.926570 | -2.153349 |
| 28 | 8 | 0 | 1.212973  | 6.235908  | -0.958806 |
| 29 | 8 | 0 | -3.103726 | 5.478141  | -2.249151 |
| 30 | 6 | 0 | -3.510731 | -1.332072 | -1.389146 |
| 31 | 6 | 0 | -4.703082 | -1.214864 | -1.162117 |
| 32 | 6 | 0 | -6.084910 | -1.019639 | -0.901883 |
| 33 | 6 | 0 | 1.253470  | -6.800692 | -2.084036 |
| 34 | 6 | 0 | -1.156841 | 7.314620  | -1.599920 |
| 35 | 6 | 0 | -6.991255 | -2.099202 | -0.971670 |
| 36 | 6 | 0 | -8.340133 | -1.906715 | -0.718821 |
| 37 | 6 | 0 | -8.836821 | -0.628553 | -0.382768 |
| 38 | 6 | 0 | -7.928859 | 0.450424  | -0.312604 |



|    |    |   |            |           |           |
|----|----|---|------------|-----------|-----------|
| 39 | 6  | 0 | -6.580187  | 0.259327  | -0.567199 |
| 40 | 6  | 0 | -10.218688 | -0.433130 | -0.116487 |
| 41 | 1  | 0 | 3.906484   | -2.519655 | -2.100171 |
| 42 | 1  | 0 | 3.507653   | -0.100694 | -1.829673 |
| 43 | 1  | 0 | -2.645479  | -3.746494 | -1.574264 |
| 44 | 1  | 0 | 2.594196   | 4.183383  | -0.641493 |
| 45 | 1  | 0 | -3.714915  | 3.085289  | -2.565426 |
| 46 | 1  | 0 | -3.353379  | 0.647103  | -2.470475 |
| 47 | 1  | 0 | 0.894784   | -7.292319 | -1.177201 |
| 48 | 1  | 0 | 0.700917   | -7.206523 | -2.933641 |
| 49 | 1  | 0 | 2.321528   | -6.958899 | -2.208322 |
| 50 | 1  | 0 | -0.451049  | 7.797952  | -2.278188 |
| 51 | 1  | 0 | -2.180685  | 7.495629  | -1.916462 |
| 52 | 1  | 0 | -0.989583  | 7.708911  | -0.595279 |
| 53 | 1  | 0 | -6.620403  | -3.086017 | -1.228084 |
| 54 | 1  | 0 | -9.029306  | -2.742451 | -0.776502 |
| 55 | 1  | 0 | -8.299661  | 1.436738  | -0.054908 |
| 56 | 1  | 0 | -5.890741  | 1.094922  | -0.505976 |
| 57 | 6  | 0 | -11.402862 | -0.265880 | 0.110953  |
| 58 | 6  | 0 | -12.782481 | -0.064512 | 0.364674  |
| 59 | 26 | 0 | -13.773455 | -0.274037 | 2.155088  |
| 60 | 6  | 0 | -13.408658 | 1.173881  | 0.754441  |
| 61 | 6  | 0 | -13.825473 | -1.054335 | 0.263531  |
| 62 | 6  | 0 | -12.430580 | -0.998709 | 3.528962  |
| 63 | 6  | 0 | -13.578293 | -1.843693 | 3.466882  |
| 64 | 6  | 0 | -12.863810 | 0.309515  | 3.900007  |
| 65 | 6  | 0 | -14.722955 | -1.057694 | 3.799656  |
| 66 | 6  | 0 | -14.281238 | 0.272810  | 4.067802  |
| 67 | 6  | 0 | -14.808868 | 0.947068  | 0.866906  |
| 68 | 6  | 0 | -15.065489 | -0.424713 | 0.564515  |

|    |    |   |            |           |           |
|----|----|---|------------|-----------|-----------|
| 69 | 1  | 0 | -12.890073 | 2.107935  | 0.917920  |
| 70 | 1  | 0 | -13.675581 | -2.089711 | -0.008058 |
| 71 | 1  | 0 | -11.413915 | -1.289049 | 3.301057  |
| 72 | 1  | 0 | -13.581797 | -2.891922 | 3.200858  |
| 73 | 1  | 0 | -12.231007 | 1.178048  | 4.020399  |
| 74 | 1  | 0 | -15.746036 | -1.406789 | 3.832830  |
| 75 | 1  | 0 | -14.911474 | 1.108443  | 4.340246  |
| 76 | 1  | 0 | -15.548256 | 1.684130  | 1.148429  |
| 77 | 1  | 0 | -16.033253 | -0.906941 | 0.576232  |
| 78 | 6  | 0 | 2.122722   | 2.094314  | -0.978734 |
| 79 | 6  | 0 | 3.429296   | 1.752061  | -0.538174 |
| 80 | 6  | 0 | 4.556214   | 1.593319  | -0.100288 |
| 81 | 6  | 0 | 5.865032   | 1.343199  | 0.389458  |
| 82 | 6  | 0 | 6.280274   | 0.027398  | 0.688423  |
| 83 | 6  | 0 | 6.778881   | 2.401242  | 0.581843  |
| 84 | 6  | 0 | 7.561190   | -0.220428 | 1.155494  |
| 85 | 1  | 0 | 5.582549   | -0.792119 | 0.550881  |
| 86 | 6  | 0 | 8.060428   | 2.152085  | 1.046720  |
| 87 | 1  | 0 | 6.468413   | 3.416385  | 0.357819  |
| 88 | 6  | 0 | 8.478885   | 0.836280  | 1.341505  |
| 89 | 1  | 0 | 7.870755   | -1.235040 | 1.382421  |
| 90 | 1  | 0 | 8.756653   | 2.971652  | 1.189153  |
| 91 | 6  | 0 | 9.795323   | 0.581353  | 1.811482  |
| 92 | 6  | 0 | 10.924398  | 0.365744  | 2.212293  |
| 93 | 6  | 0 | 12.235886  | 0.118029  | 2.689000  |
| 94 | 26 | 0 | 13.878111  | -0.461112 | 1.593930  |
| 95 | 6  | 0 | 13.299925  | 1.083053  | 2.807433  |
| 96 | 6  | 0 | 12.751272  | -1.142617 | 3.161076  |
| 97 | 6  | 0 | 13.260603  | -0.736456 | -0.344471 |
| 98 | 6  | 0 | 13.873684  | -1.924911 | 0.152910  |

|     |   |   |           |           |           |
|-----|---|---|-----------|-----------|-----------|
| 99  | 6 | 0 | 14.219333 | 0.318293  | -0.274641 |
| 100 | 6 | 0 | 15.212704 | -1.604788 | 0.531765  |
| 101 | 6 | 0 | 15.426381 | -0.218583 | 0.266923  |
| 102 | 6 | 0 | 14.434580 | 0.427049  | 3.361497  |
| 103 | 6 | 0 | 14.096732 | -0.943178 | 3.579254  |
| 104 | 1 | 0 | 13.227383 | 2.124958  | 2.529205  |
| 105 | 1 | 0 | 12.193811 | -2.067926 | 3.195936  |
| 106 | 1 | 0 | 12.237034 | -0.641836 | -0.680709 |
| 107 | 1 | 0 | 13.402647 | -2.894498 | 0.239558  |
| 108 | 1 | 0 | 14.055689 | 1.346044  | -0.568591 |
| 109 | 1 | 0 | 15.935549 | -2.290187 | 0.953016  |
| 110 | 1 | 0 | 16.339263 | 0.330450  | 0.453640  |
| 111 | 1 | 0 | 15.391836 | 0.885515  | 3.568187  |
| 112 | 1 | 0 | 14.753684 | -1.702644 | 3.980462  |

-----  
Rotational constants (GHZ): 0.0445943 0.0055853 0.0053348

### DFT of compound (4)

Standard orientation:

-----

| Center<br>Number | Atomic<br>Number | Atomic<br>Type | Coordinates (Angstroms) |           |           |
|------------------|------------------|----------------|-------------------------|-----------|-----------|
|                  |                  |                | X                       | Y         | Z         |
| 1                | 6                | 0              | 2.123540                | -0.820274 | -3.043691 |
| 2                | 6                | 0              | 1.787304                | 0.443714  | -2.553445 |
| 3                | 6                | 0              | 0.475817                | 0.775732  | -2.194168 |
| 4                | 6                | 0              | -0.563976               | -0.181550 | -2.442103 |
| 5                | 6                | 0              | -0.194127               | -1.490685 | -2.877147 |

-----

|    |   |   |           |           |           |
|----|---|---|-----------|-----------|-----------|
| 6  | 6 | 0 | 1.152101  | -1.798961 | -3.171788 |
| 7  | 6 | 0 | -1.945497 | 0.149272  | -2.265394 |
| 8  | 6 | 0 | -2.903795 | -0.897567 | -2.334530 |
| 9  | 6 | 0 | -2.496515 | -2.201806 | -2.722677 |
| 10 | 6 | 0 | -1.187059 | -2.491363 | -3.022991 |
| 11 | 6 | 0 | 0.128225  | 2.069210  | -1.599250 |
| 12 | 6 | 0 | -1.243698 | 2.471596  | -1.650302 |
| 13 | 6 | 0 | -2.279462 | 1.559793  | -2.047042 |
| 14 | 6 | 0 | 0.667700  | 4.256721  | -0.614595 |
| 15 | 6 | 0 | -0.622992 | 4.694994  | -0.793494 |
| 16 | 6 | 0 | -1.605397 | 3.808530  | -1.298995 |
| 17 | 6 | 0 | -2.934827 | 4.260478  | -1.455008 |
| 18 | 6 | 0 | -3.895171 | 3.394417  | -1.950805 |
| 19 | 6 | 0 | -3.572245 | 2.063704  | -2.228457 |
| 20 | 6 | 0 | -0.837483 | -3.864996 | -3.469139 |
| 21 | 7 | 0 | 0.515144  | -4.102068 | -3.755748 |
| 22 | 6 | 0 | 1.537772  | -3.153031 | -3.636031 |
| 23 | 6 | 0 | -0.972582 | 6.088396  | -0.420099 |
| 24 | 7 | 0 | -2.301689 | 6.480252  | -0.612504 |
| 25 | 6 | 0 | -3.319175 | 5.652064  | -1.112712 |
| 26 | 8 | 0 | -1.677514 | -4.746523 | -3.584134 |
| 27 | 8 | 0 | 2.692880  | -3.453885 | -3.907000 |
| 28 | 8 | 0 | -0.154006 | 6.875938  | 0.034152  |
| 29 | 8 | 0 | -4.462403 | 6.064319  | -1.254901 |
| 30 | 6 | 0 | -4.275091 | -0.776009 | -1.987677 |
| 31 | 6 | 0 | -5.451022 | -0.818934 | -1.667062 |
| 32 | 6 | 0 | -6.815750 | -0.809116 | -1.278246 |
| 33 | 6 | 0 | 0.915255  | -5.438383 | -4.210745 |
| 34 | 6 | 0 | -2.632485 | 7.863077  | -0.249175 |
| 35 | 6 | 0 | -7.639736 | -1.932187 | -1.506109 |

|    |    |   |            |           |           |
|----|----|---|------------|-----------|-----------|
| 36 | 6  | 0 | -8.970754  | -1.920977 | -1.121178 |
| 37 | 6  | 0 | -9.531057  | -0.788423 | -0.490682 |
| 38 | 6  | 0 | -8.705633  | 0.334931  | -0.264685 |
| 39 | 6  | 0 | -7.375009  | 0.325202  | -0.650343 |
| 40 | 6  | 0 | -10.892588 | -0.781267 | -0.086548 |
| 41 | 1  | 0 | 3.144964   | -1.059877 | -3.317948 |
| 42 | 1  | 0 | 2.568951   | 1.182512  | -2.457071 |
| 43 | 1  | 0 | -3.236564  | -2.989924 | -2.794919 |
| 44 | 1  | 0 | 1.394080   | 4.932087  | -0.177922 |
| 45 | 1  | 0 | -4.902570  | 3.765814  | -2.102865 |
| 46 | 1  | 0 | -4.350312  | 1.412301  | -2.597273 |
| 47 | 1  | 0 | 0.017138   | -6.046087 | -4.283728 |
| 48 | 1  | 0 | 1.411711   | -5.362820 | -5.179918 |
| 49 | 1  | 0 | 1.618015   | -5.877553 | -3.499409 |
| 50 | 1  | 0 | -2.020344  | 8.554018  | -0.832192 |
| 51 | 1  | 0 | -3.688180  | 8.016160  | -0.457071 |
| 52 | 1  | 0 | -2.420060  | 8.027683  | 0.809111  |
| 53 | 1  | 0 | -7.219371  | -2.808591 | -1.988066 |
| 54 | 1  | 0 | -9.596479  | -2.788706 | -1.300449 |
| 55 | 1  | 0 | -9.125786  | 1.210280  | 0.218883  |
| 56 | 1  | 0 | -6.748443  | 1.191650  | -0.465981 |
| 57 | 6  | 0 | -12.059103 | -0.775404 | 0.261995  |
| 58 | 6  | 0 | -13.419569 | -0.762983 | 0.657405  |
| 59 | 26 | 0 | -14.214527 | -1.421304 | 2.435973  |
| 60 | 6  | 0 | -14.102442 | 0.305640  | 1.342815  |
| 61 | 6  | 0 | -14.385150 | -1.810020 | 0.434115  |
| 62 | 6  | 0 | -12.675716 | -2.199293 | 3.551582  |
| 63 | 6  | 0 | -13.693800 | -3.180506 | 3.361387  |
| 64 | 6  | 0 | -13.257960 | -1.081420 | 4.220751  |
| 65 | 6  | 0 | -14.907248 | -2.668935 | 3.913348  |

|    |   |   |            |           |           |
|----|---|---|------------|-----------|-----------|
| 66 | 6 | 0 | -14.637697 | -1.372018 | 4.444792  |
| 67 | 6 | 0 | -15.462809 | -0.074761 | 1.513225  |
| 68 | 6 | 0 | -15.637052 | -1.376918 | 0.953492  |
| 69 | 1 | 0 | -13.647245 | 1.235041  | 1.654551  |
| 70 | 1 | 0 | -14.180126 | -2.750219 | -0.058031 |
| 71 | 1 | 0 | -11.650182 | -2.273792 | 3.216043  |
| 72 | 1 | 0 | -13.570532 | -4.137965 | 2.873917  |
| 73 | 1 | 0 | -12.746169 | -0.170335 | 4.499017  |
| 74 | 1 | 0 | -15.864451 | -3.172280 | 3.920124  |
| 75 | 1 | 0 | -15.355280 | -0.720152 | 4.924047  |
| 76 | 1 | 0 | -16.228588 | 0.515767  | 1.996986  |
| 77 | 1 | 0 | -16.557778 | -1.943695 | 0.939922  |
| 78 | 6 | 0 | 1.066816   | 2.950307  | -0.997732 |
| 79 | 6 | 0 | 2.407209   | 2.607389  | -0.672862 |
| 80 | 6 | 0 | 3.550243   | 2.410028  | -0.298895 |
| 81 | 6 | 0 | 4.875860   | 2.106681  | 0.105377  |
| 82 | 6 | 0 | 5.365570   | 0.786162  | 0.010809  |
| 83 | 6 | 0 | 5.725185   | 3.106678  | 0.622489  |
| 84 | 6 | 0 | 6.655971   | 0.482358  | 0.411110  |
| 85 | 1 | 0 | 4.717746   | 0.005711  | -0.373260 |
| 86 | 6 | 0 | 7.020432   | 2.802241  | 1.009699  |
| 87 | 1 | 0 | 5.353261   | 4.119681  | 0.728001  |
| 88 | 6 | 0 | 7.519807   | 1.487427  | 0.898068  |
| 89 | 1 | 0 | 7.006217   | -0.539422 | 0.325470  |
| 90 | 1 | 0 | 7.635254   | 3.584008  | 1.437128  |
| 91 | 6 | 0 | 8.884428   | 1.147896  | 1.331420  |
| 92 | 6 | 0 | 9.965014   | 1.987915  | 1.233417  |
| 93 | 6 | 0 | 9.085588   | -0.219330 | 1.932744  |
| 94 | 6 | 0 | 9.943092   | 3.253269  | 0.558703  |
| 95 | 6 | 0 | 11.245057  | 1.630461  | 1.772275  |

|     |    |   |           |           |           |
|-----|----|---|-----------|-----------|-----------|
| 96  | 6  | 0 | 8.881701  | -0.344150 | 3.286665  |
| 97  | 6  | 0 | 9.382174  | -1.299066 | 1.002650  |
| 98  | 7  | 0 | 9.983359  | 4.274344  | 0.002430  |
| 99  | 7  | 0 | 12.296099 | 1.369277  | 2.197779  |
| 100 | 6  | 0 | 8.483681  | 0.780245  | 4.080072  |
| 101 | 6  | 0 | 9.074288  | -1.567829 | 4.002240  |
| 102 | 26 | 0 | 11.060223 | -2.468188 | 0.776365  |
| 103 | 6  | 0 | 9.075852  | -2.709924 | 1.151144  |
| 104 | 6  | 0 | 9.948431  | -1.133486 | -0.318908 |
| 105 | 7  | 0 | 8.153150  | 1.689600  | 4.726918  |
| 106 | 7  | 0 | 9.239000  | -2.552435 | 4.600886  |
| 107 | 6  | 0 | 12.444807 | -2.012248 | 2.237851  |
| 108 | 6  | 0 | 12.990193 | -1.762680 | 0.944530  |
| 109 | 6  | 0 | 12.078409 | -3.387029 | 2.312055  |
| 110 | 6  | 0 | 12.966283 | -2.989372 | 0.216035  |
| 111 | 6  | 0 | 12.402362 | -3.992870 | 1.060259  |
| 112 | 6  | 0 | 9.407725  | -3.360999 | -0.065698 |
| 113 | 6  | 0 | 9.954267  | -2.396361 | -0.964237 |
| 114 | 1  | 0 | 8.633707  | -3.175028 | 2.018537  |
| 115 | 1  | 0 | 10.295524 | -0.202538 | -0.743516 |
| 116 | 1  | 0 | 12.308434 | -1.269512 | 3.010936  |
| 117 | 1  | 0 | 13.347750 | -0.806917 | 0.588893  |
| 118 | 1  | 0 | 11.611662 | -3.872006 | 3.158218  |
| 119 | 1  | 0 | 13.302701 | -3.132134 | -0.801974 |
| 120 | 1  | 0 | 12.234340 | -5.027179 | 0.792108  |
| 121 | 1  | 0 | 9.286354  | -4.416975 | -0.263900 |
| 122 | 1  | 0 | 10.326529 | -2.594191 | -1.959722 |

-----  
Rotational constants (GHZ): 0.0323739 0.0053513 0.0051167

## DFT of compound (5)

Standard orientation:

| -----  |        |        |                         |           |           |  |
|--------|--------|--------|-------------------------|-----------|-----------|--|
| Center | Atomic | Atomic | Coordinates (Angstroms) |           |           |  |
| Number | Number | Type   | X                       | Y         | Z         |  |
| -----  |        |        |                         |           |           |  |
| 1      | 6      | 0      | 2.929500                | -1.136113 | -2.562545 |  |
| 2      | 6      | 0      | 2.741625                | 0.196521  | -2.186849 |  |
| 3      | 6      | 0      | 1.499817                | 0.680061  | -1.761151 |  |
| 4      | 6      | 0      | 0.368798                | -0.201840 | -1.819794 |  |
| 5      | 6      | 0      | 0.591792                | -1.576742 | -2.137703 |  |
| 6      | 6      | 0      | 1.877176                | -2.034014 | -2.504980 |  |
| 7      | 6      | 0      | -0.961200               | 0.267041  | -1.573553 |  |
| 8      | 6      | 0      | -2.002143               | -0.692813 | -1.459405 |  |
| 9      | 6      | 0      | -1.737962               | -2.061104 | -1.728230 |  |
| 10     | 6      | 0      | -0.486008               | -2.494389 | -2.093113 |  |
| 11     | 6      | 0      | 1.311860                | 2.052116  | -1.279887 |  |
| 12     | 6      | 0      | -0.023840               | 2.564994  | -1.253850 |  |
| 13     | 6      | 0      | -1.160178               | 1.716873  | -1.477197 |  |
| 14     | 6      | 0      | 2.107514                | 4.268365  | -0.571285 |  |
| 15     | 6      | 0      | 0.842507                | 4.794987  | -0.672593 |  |
| 16     | 6      | 0      | -0.247147               | 3.953897  | -1.005399 |  |
| 17     | 6      | 0      | -1.545160               | 4.504494  | -1.095554 |  |
| 18     | 6      | 0      | -2.610144               | 3.687969  | -1.434704 |  |
| 19     | 6      | 0      | -2.417601               | 2.314804  | -1.612099 |  |
| 20     | 6      | 0      | -0.280535               | -3.930175 | -2.409329 |  |
| 21     | 7      | 0      | 1.012703                | -4.318690 | -2.775134 |  |
| 22     | 6      | 0      | 2.118502                | -3.457560 | -2.849348 |  |



|    |   |   |           |           |           |
|----|---|---|-----------|-----------|-----------|
| 23 | 6 | 0 | 0.637326  | 6.241513  | -0.402833 |
| 24 | 7 | 0 | -0.669455 | 6.726787  | -0.512605 |
| 25 | 6 | 0 | -1.787478 | 5.950023  | -0.853197 |
| 26 | 8 | 0 | -1.184274 | -4.753164 | -2.361049 |
| 27 | 8 | 0 | 3.223371  | -3.866846 | -3.179076 |
| 28 | 8 | 0 | 1.554606  | 6.990806  | -0.098585 |
| 29 | 6 | 0 | -3.330515 | -0.414035 | -1.037094 |
| 30 | 6 | 0 | -4.484278 | -0.321195 | -0.655787 |
| 31 | 6 | 0 | -5.824960 | -0.148760 | -0.222989 |
| 32 | 6 | 0 | 1.200999  | -5.738276 | -3.096272 |
| 33 | 6 | 0 | -0.858669 | 8.158480  | -0.248823 |
| 34 | 6 | 0 | -6.763419 | -1.194231 | -0.351387 |
| 35 | 6 | 0 | -8.078866 | -1.012382 | 0.043602  |
| 36 | 6 | 0 | -8.503243 | 0.208886  | 0.609468  |
| 37 | 6 | 0 | -7.564533 | 1.254679  | 0.729140  |
| 38 | 6 | 0 | -6.251721 | 1.080472  | 0.321420  |
| 39 | 1 | 0 | 3.900397  | -1.491314 | -2.889664 |
| 40 | 1 | 0 | 3.586520  | 0.866979  | -2.234230 |
| 41 | 1 | 0 | -2.541399 | -2.784670 | -1.656415 |
| 42 | 1 | 0 | 2.921981  | 4.917221  | -0.271482 |
| 43 | 1 | 0 | -3.593412 | 4.131852  | -1.544452 |
| 44 | 1 | 0 | -3.272432 | 1.706427  | -1.866374 |
| 45 | 1 | 0 | 0.939828  | -6.350523 | -2.230743 |
| 46 | 1 | 0 | 0.546680  | -6.018652 | -3.924008 |
| 47 | 1 | 0 | 2.244018  | -5.880917 | -3.366244 |
| 48 | 1 | 0 | -0.285811 | 8.746504  | -0.968940 |
| 49 | 1 | 0 | -1.920054 | 8.374320  | -0.338254 |
| 50 | 1 | 0 | -0.497750 | 8.397163  | 0.753180  |
| 51 | 1 | 0 | -6.448306 | -2.143098 | -0.771333 |
| 52 | 1 | 0 | -8.780505 | -1.830694 | -0.068533 |

|    |   |   |            |           |           |
|----|---|---|------------|-----------|-----------|
| 53 | 1 | 0 | -7.871192  | 2.222188  | 1.106018  |
| 54 | 1 | 0 | -5.545603  | 1.898703  | 0.409526  |
| 55 | 6 | 0 | -9.909888  | 0.400318  | 1.001528  |
| 56 | 6 | 0 | -10.321325 | 1.171173  | 2.058307  |
| 57 | 6 | 0 | -11.388182 | 0.377346  | -0.961897 |
| 58 | 6 | 0 | -9.430540  | 1.765788  | 3.012657  |
| 59 | 6 | 0 | -11.711118 | 1.409601  | 2.320036  |
| 60 | 6 | 0 | -10.870993 | 1.669942  | -1.299221 |
| 61 | 6 | 0 | -12.393259 | -0.134694 | -1.841522 |
| 62 | 7 | 0 | -8.751071  | 2.246813  | 3.825284  |
| 63 | 7 | 0 | -12.830027 | 1.621223  | 2.558757  |
| 64 | 7 | 0 | -10.445997 | 2.716394  | -1.580197 |
| 65 | 7 | 0 | -13.218489 | -0.531916 | -2.559947 |
| 66 | 8 | 0 | -2.902992  | 6.442636  | -0.941978 |
| 67 | 6 | 0 | 2.368754   | 2.903843  | -0.861878 |
| 68 | 6 | 0 | 3.712444   | 2.493866  | -0.645090 |
| 69 | 6 | 0 | 4.880319   | 2.268076  | -0.380089 |
| 70 | 6 | 0 | 6.235454   | 1.953324  | -0.099051 |
| 71 | 6 | 0 | 6.668049   | 0.610741  | -0.057861 |
| 72 | 6 | 0 | 7.174238   | 2.974705  | 0.153422  |
| 73 | 6 | 0 | 7.991543   | 0.304675  | 0.214706  |
| 74 | 1 | 0 | 5.952450   | -0.184384 | -0.236643 |
| 75 | 6 | 0 | 8.500627   | 2.666251  | 0.410415  |
| 76 | 1 | 0 | 6.849504   | 4.009188  | 0.154240  |
| 77 | 6 | 0 | 8.940914   | 1.326569  | 0.429290  |
| 78 | 1 | 0 | 8.298155   | -0.734447 | 0.237532  |
| 79 | 1 | 0 | 9.191333   | 3.469550  | 0.634009  |
| 80 | 6 | 0 | 10.345771  | 0.993177  | 0.720651  |
| 81 | 6 | 0 | 11.416686  | 1.746736  | 0.313957  |
| 82 | 6 | 0 | 11.316872  | 2.870278  | -0.572483 |

|     |    |   |            |           |           |
|-----|----|---|------------|-----------|-----------|
| 83  | 6  | 0 | 12.756596  | 1.431689  | 0.716902  |
| 84  | 6  | 0 | 10.603503  | -0.115732 | 2.899212  |
| 85  | 7  | 0 | 11.291460  | 3.771055  | -1.308252 |
| 86  | 7  | 0 | 13.855386  | 1.204322  | 1.024497  |
| 87  | 6  | 0 | 10.367011  | 1.156050  | 3.514553  |
| 88  | 6  | 0 | 10.867978  | -1.197101 | 3.797389  |
| 89  | 7  | 0 | 10.167219  | 2.186568  | 4.017318  |
| 90  | 7  | 0 | 11.094045  | -2.064333 | 4.540198  |
| 91  | 6  | 0 | 10.597707  | -0.251889 | 1.530780  |
| 92  | 6  | 0 | 10.715280  | -1.497154 | 0.786806  |
| 93  | 26 | 0 | 12.314638  | -2.764296 | 0.519756  |
| 94  | 6  | 0 | 10.415922  | -2.841298 | 1.245104  |
| 95  | 6  | 0 | 11.058568  | -1.603223 | -0.615608 |
| 96  | 6  | 0 | 13.928677  | -2.116902 | 1.632200  |
| 97  | 6  | 0 | 14.256833  | -2.130015 | 0.244927  |
| 98  | 6  | 0 | 13.557384  | -3.437237 | 2.017436  |
| 99  | 6  | 0 | 14.093041  | -3.465460 | -0.230216 |
| 100 | 6  | 0 | 13.660479  | -4.273251 | 0.864406  |
| 101 | 6  | 0 | 10.531995  | -3.718887 | 0.135570  |
| 102 | 6  | 0 | 10.937414  | -2.961729 | -1.004171 |
| 103 | 1  | 0 | 10.116461  | -3.119491 | 2.243558  |
| 104 | 1  | 0 | 11.344299  | -0.782997 | -1.258345 |
| 105 | 1  | 0 | 13.933868  | -1.241610 | 2.266136  |
| 106 | 1  | 0 | 14.567232  | -1.272285 | -0.334446 |
| 107 | 1  | 0 | 13.230093  | -3.740127 | 3.002472  |
| 108 | 1  | 0 | 14.254329  | -3.804972 | -1.244425 |
| 109 | 1  | 0 | 13.434332  | -5.330154 | 0.823030  |
| 110 | 1  | 0 | 10.363969  | -4.786668 | 0.162059  |
| 111 | 1  | 0 | 11.137363  | -3.355551 | -1.990904 |
| 112 | 6  | 0 | -10.947182 | -0.291824 | 0.155462  |

|     |    |   |            |           |           |
|-----|----|---|------------|-----------|-----------|
| 113 | 6  | 0 | -11.306760 | -1.646720 | 0.547386  |
| 114 | 26 | 0 | -13.083328 | -2.426157 | 1.233241  |
| 115 | 6  | 0 | -11.783581 | -2.722607 | -0.302152 |
| 116 | 6  | 0 | -11.143826 | -2.204933 | 1.872962  |
| 117 | 6  | 0 | -14.541048 | -0.964645 | 1.249547  |
| 118 | 6  | 0 | -14.345371 | -1.482988 | 2.562941  |
| 119 | 6  | 0 | -14.923535 | -2.039335 | 0.395693  |
| 120 | 6  | 0 | -14.612723 | -2.884322 | 2.524120  |
| 121 | 6  | 0 | -14.970024 | -3.228138 | 1.185302  |
| 122 | 6  | 0 | -11.859195 | -3.901631 | 0.484691  |
| 123 | 6  | 0 | -11.478454 | -3.582070 | 1.822518  |
| 124 | 1  | 0 | -12.001161 | -2.650174 | -1.356397 |
| 125 | 1  | 0 | -10.811005 | -1.664958 | 2.747508  |
| 126 | 1  | 0 | -14.391479 | 0.064888  | 0.956724  |
| 127 | 1  | 0 | -14.041219 | -0.907191 | 3.425388  |
| 128 | 1  | 0 | -15.114806 | -1.965837 | -0.665868 |
| 129 | 1  | 0 | -14.543744 | -3.569001 | 3.358567  |
| 130 | 1  | 0 | -15.215078 | -4.219271 | 0.828234  |
| 131 | 1  | 0 | -12.177770 | -4.871819 | 0.129197  |
| 132 | 1  | 0 | -11.465457 | -4.264895 | 2.660541  |

-----  
Rotational constants (GHZ): 0.0328778 0.0044724 0.0041821

## TD-DFT Calculation

### Compound (1)

Excitation energies and oscillator strengths:

|                  |           |           |           |          |                                  |
|------------------|-----------|-----------|-----------|----------|----------------------------------|
| Excited State 1: | Singlet-A | 2.2080 eV | 561.52 nm | f=0.0001 | $\langle S^{*2} \rangle = 0.000$ |
|                  | 184 ->197 | 0.17657   |           |          |                                  |
|                  | 184 ->198 | 0.20724   |           |          |                                  |
|                  | 185 ->189 | 0.13733   |           |          |                                  |
|                  | 185 ->192 | -0.12440  |           |          |                                  |
|                  | 185 ->193 | -0.11829  |           |          |                                  |
|                  | 185 ->195 | -0.13442  |           |          |                                  |
|                  | 185 ->197 | 0.35361   |           |          |                                  |
|                  | 185 ->198 | -0.29424  |           |          |                                  |
|                  | 185 ->199 | 0.11457   |           |          |                                  |
|                  | 186 ->197 | -0.18882  |           |          |                                  |
|                  | 186 ->198 | -0.22610  |           |          |                                  |
|                  | 187 ->198 | -0.10861  |           |          |                                  |

This state for optimization and/or second-order correction.

Total Energy, E(TD-HF/TD-KS) = -3441.48004991

Copying the excited state density for this state as the 1-particle RhoCI density.

|                  |           |           |           |          |                                  |
|------------------|-----------|-----------|-----------|----------|----------------------------------|
| Excited State 2: | Singlet-A | 2.2088 eV | 561.32 nm | f=0.0179 | $\langle S^{*2} \rangle = 0.000$ |
|                  | 184 ->197 | -0.22936  |           |          |                                  |
|                  | 184 ->198 | 0.19226   |           |          |                                  |
|                  | 185 ->197 | 0.27356   |           |          |                                  |
|                  | 185 ->198 | 0.32539   |           |          |                                  |
|                  | 186 ->197 | 0.24009   |           |          |                                  |
|                  | 186 ->198 | -0.19966  |           |          |                                  |
|                  | 187 ->197 | 0.11208   |           |          |                                  |

Excited State 3: Singlet-A 2.4112 eV 514.21 nm f=0.7668 <S\*\*2>=0.000  
186 ->188 -0.28555  
187 ->188 0.62702

Excited State 4: Singlet-A 2.5813 eV 480.31 nm f=0.0074 <S\*\*2>=0.000  
182 ->189 -0.10880  
182 ->192 0.10425  
182 ->193 0.10084  
182 ->195 0.11736  
182 ->197 -0.32922  
182 ->198 0.24670  
182 ->199 -0.10640  
184 ->197 -0.10409  
185 ->197 -0.23819  
185 ->198 -0.32134  
186 ->197 0.13999  
186 ->198 -0.10366

Excited State 5: Singlet-A 2.6296 eV 471.49 nm f=0.0000 <S\*\*2>=0.000  
182 ->197 0.26120  
182 ->198 0.35128  
184 ->197 -0.18212  
184 ->198 -0.24618  
185 ->197 0.20649  
185 ->198 -0.15006  
186 ->197 0.16896  
186 ->198 0.22660

Excited State 6: Singlet-A 3.1218 eV 397.16 nm f=0.8973 <S\*\*2>=0.000  
183 ->188 0.28840

|           |         |
|-----------|---------|
| 184 ->188 | 0.36782 |
| 186 ->188 | 0.44603 |
| 187 ->188 | 0.20180 |

Excited State 7: Singlet-A 3.4466 eV 359.73 nm f=0.0013 <S\*\*2>=0.000

|           |          |
|-----------|----------|
| 182 ->189 | 0.12315  |
| 182 ->192 | -0.10950 |
| 182 ->193 | -0.10351 |
| 182 ->195 | -0.11643 |
| 182 ->197 | 0.31616  |
| 182 ->198 | -0.23753 |
| 184 ->197 | -0.16013 |
| 184 ->198 | 0.11575  |
| 185 ->197 | -0.22193 |
| 185 ->198 | -0.30080 |
| 186 ->197 | 0.13488  |

Excited State 8: Singlet-A 3.5288 eV 351.35 nm f=0.0001 <S\*\*2>=0.000

|           |          |
|-----------|----------|
| 182 ->197 | -0.30640 |
| 182 ->198 | -0.40921 |
| 184 ->197 | -0.10918 |
| 184 ->198 | -0.14876 |
| 185 ->189 | 0.12310  |
| 185 ->197 | 0.19297  |
| 185 ->198 | -0.14005 |
| 186 ->197 | 0.15217  |
| 186 ->198 | 0.20438  |
| 187 ->198 | 0.11246  |

Excited State 9: Singlet-A 3.6785 eV 337.05 nm f=0.5683 <S\*\*2>=0.000

|           |          |
|-----------|----------|
| 175 ->188 | -0.13613 |
| 177 ->188 | 0.26987  |
| 179 ->188 | 0.13220  |
| 180 ->188 | 0.24470  |
| 183 ->188 | -0.20421 |
| 186 ->188 | 0.11093  |
| 186 ->192 | -0.11942 |
| 187 ->189 | 0.43229  |

Excited State 10: Singlet-A 3.7815 eV 327.87 nm f=0.1384 <S\*\*2>=0.000

|           |          |
|-----------|----------|
| 177 ->188 | 0.11399  |
| 180 ->188 | 0.54984  |
| 180 ->190 | 0.10849  |
| 183 ->188 | 0.10209  |
| 186 ->193 | 0.11391  |
| 187 ->189 | -0.28372 |
| 187 ->193 | -0.11267 |

Excited State 11: Singlet-A 3.8987 eV 318.01 nm f=0.0064 <S\*\*2>=0.000

|           |          |
|-----------|----------|
| 175 ->188 | 0.11856  |
| 177 ->188 | -0.30870 |
| 180 ->188 | 0.11770  |
| 183 ->188 | -0.24274 |
| 184 ->188 | -0.20890 |
| 186 ->188 | 0.32024  |
| 186 ->189 | 0.10262  |
| 186 ->191 | -0.14753 |
| 187 ->188 | 0.16067  |
| 187 ->189 | -0.11906 |
| 187 ->191 | 0.19903  |



Excited State 12: Singlet-A 3.9229 eV 316.05 nm f=0.7205 <S\*\*2>=0.000

|           |          |
|-----------|----------|
| 175 ->188 | -0.19332 |
| 177 ->188 | 0.32767  |
| 179 ->188 | 0.11203  |
| 180 ->188 | -0.17663 |
| 183 ->188 | -0.14343 |
| 184 ->188 | -0.13467 |
| 184 ->189 | -0.12838 |
| 186 ->188 | 0.24132  |
| 187 ->188 | 0.14530  |
| 187 ->189 | -0.30849 |
| 187 ->191 | -0.16534 |

Excited State 13: Singlet-A 4.0198 eV 308.44 nm f=0.0002 <S\*\*2>=0.000

|           |         |
|-----------|---------|
| 185 ->188 | 0.67498 |
| 185 ->189 | 0.10965 |

Excited State 14: Singlet-A 4.1327 eV 300.01 nm f=0.0160 <S\*\*2>=0.000

|           |          |
|-----------|----------|
| 172 ->188 | -0.16858 |
| 172 ->190 | -0.10917 |
| 174 ->188 | -0.16508 |
| 175 ->188 | 0.14945  |
| 177 ->188 | 0.10862  |
| 184 ->188 | 0.21414  |
| 186 ->188 | -0.10045 |
| 186 ->190 | -0.25114 |
| 186 ->191 | -0.11139 |
| 187 ->189 | -0.11437 |
| 187 ->190 | 0.41116  |

187 ->191 0.12474

Excited State 15: Singlet-A 4.1512 eV 298.67 nm f=0.0017 <S\*\*2>=0.000

172 ->188 0.46444

172 ->190 0.23423

172 ->195 -0.10288

173 ->188 -0.14833

174 ->188 0.17936

186 ->190 -0.15899

187 ->190 0.25277

SavETr: write IOETrn= 770 NScale= 10 NData= 16 NLR=1 NState= 15 LETran= 280.

## Compound (2)

Excitation energies and oscillator strengths:

Excited State 1: Singlet-A 1.9811 eV 625.84 nm f=0.0003 <S\*\*2>=0.000

217 -> 221 0.10351

217 -> 222 0.42433

217 -> 229 0.10207

217 -> 234 -0.44617

218 -> 231 0.11374

218 -> 232 0.13551

218 -> 233 0.17829

This state for optimization and/or second-order correction.

Total Energy, E(TD-HF/TD-KS) = -3888.86959312

Copying the excited state density for this state as the 1-particle RhoCI density.

Excited State 2: Singlet-A 2.0327 eV 609.94 nm f=0.0130 <S\*\*2>=0.000

217 -> 231 -0.12728

217 -> 232 -0.15126

217 -> 233 -0.19878

218 -> 222 0.39322  
218 -> 234 -0.44428

Excited State 3: Singlet-A 2.4412 eV 507.88 nm f=0.0170 <S\*\*2>=0.000

213 -> 222 0.21108  
213 -> 234 -0.29769  
214 -> 222 0.18636  
214 -> 234 -0.25797  
215 -> 234 -0.12602  
217 -> 231 0.18541  
217 -> 232 0.22130  
217 -> 233 0.29259

Excited State 4: Singlet-A 2.4514 eV 505.76 nm f=0.7395 <S\*\*2>=0.000

219 -> 220 0.68528

Excited State 5: Singlet-A 2.5924 eV 478.25 nm f=0.0001 <S\*\*2>=0.000

213 -> 231 0.11902  
213 -> 232 0.14203  
213 -> 233 0.18769  
214 -> 232 0.11826  
214 -> 233 0.15609  
215 -> 232 0.11221  
215 -> 233 0.14834  
217 -> 222 0.15534  
218 -> 231 -0.23169  
218 -> 232 -0.27627  
218 -> 233 -0.36502

Excited State 6: Singlet-A 3.0729 eV 403.48 nm f=0.0132 <S\*\*2>=0.000

|            |          |
|------------|----------|
| 213 -> 222 | -0.20549 |
| 213 -> 234 | 0.19535  |
| 214 -> 222 | -0.17499 |
| 214 -> 234 | 0.17279  |
| 215 -> 222 | -0.14551 |
| 215 -> 234 | 0.10241  |
| 217 -> 231 | 0.18801  |
| 217 -> 232 | 0.22500  |
| 217 -> 233 | 0.29790  |
| 218 -> 222 | 0.32695  |

Excited State 7: Singlet-A 3.2465 eV 381.90 nm f=1.5450 <S\*\*2>=0.000

|            |          |
|------------|----------|
| 216 -> 220 | 0.48237  |
| 216 -> 221 | -0.19189 |
| 218 -> 220 | 0.10567  |
| 218 -> 221 | -0.11210 |
| 219 -> 221 | 0.39205  |

Excited State 8: Singlet-A 3.2953 eV 376.24 nm f=0.0034 <S\*\*2>=0.000

|            |          |
|------------|----------|
| 213 -> 231 | -0.14751 |
| 213 -> 232 | -0.17577 |
| 213 -> 233 | -0.23208 |
| 214 -> 231 | -0.13008 |
| 214 -> 232 | -0.15534 |
| 214 -> 233 | -0.20533 |
| 217 -> 222 | 0.40088  |
| 217 -> 234 | 0.19036  |
| 218 -> 231 | -0.10409 |
| 218 -> 232 | -0.12414 |
| 218 -> 233 | -0.16379 |

Excited State 9: Singlet-A 3.4309 eV 361.38 nm f=0.0026 <S\*\*2>=0.000

|            |          |
|------------|----------|
| 211 -> 220 | 0.16245  |
| 216 -> 220 | 0.42214  |
| 216 -> 221 | 0.17961  |
| 218 -> 221 | 0.17598  |
| 219 -> 221 | -0.37235 |
| 219 -> 224 | -0.11936 |
| 219 -> 225 | 0.12866  |

Excited State 10: Singlet-A 3.4717 eV 357.12 nm f=0.0815 <S\*\*2>=0.000

|            |          |
|------------|----------|
| 215 -> 221 | 0.11904  |
| 216 -> 221 | -0.10287 |
| 218 -> 220 | -0.33845 |
| 218 -> 221 | 0.51159  |
| 218 -> 222 | -0.15764 |
| 219 -> 221 | 0.20258  |

Excited State 11: Singlet-A 3.6565 eV 339.08 nm f=0.0202 <S\*\*2>=0.000

|            |          |
|------------|----------|
| 217 -> 220 | -0.34572 |
| 217 -> 221 | 0.50867  |
| 217 -> 222 | -0.18690 |
| 218 -> 222 | 0.12380  |
| 218 -> 234 | 0.15404  |

Excited State 12: Singlet-A 3.7308 eV 332.33 nm f=0.0352 <S\*\*2>=0.000

|            |          |
|------------|----------|
| 209 -> 220 | -0.16922 |
| 211 -> 220 | -0.23847 |
| 212 -> 220 | 0.55154  |
| 212 -> 221 | 0.14142  |

212 -> 223 0.10789  
219 -> 226 0.13985

Excited State 13: Singlet-A 3.7644 eV 329.36 nm f=0.1894 <S\*\*2>=0.000

215 -> 221 0.10842  
215 -> 222 0.23916  
217 -> 220 0.14462  
217 -> 221 -0.21071  
217 -> 233 -0.10265  
218 -> 222 0.36781  
218 -> 234 0.39247

Excited State 14: Singlet-A 3.8006 eV 326.22 nm f=0.0007 <S\*\*2>=0.000

213 -> 231 -0.10662  
213 -> 232 -0.12727  
213 -> 233 -0.16813  
214 -> 232 -0.11348  
214 -> 233 -0.14978  
217 -> 221 -0.12604  
217 -> 222 -0.24942  
217 -> 229 0.10112  
217 -> 234 -0.45434  
218 -> 231 -0.10987  
218 -> 232 -0.13062  
218 -> 233 -0.17253  
218 -> 234 -0.10129

Excited State 15: Singlet-A 3.8786 eV 319.66 nm f=0.0404 <S\*\*2>=0.000

203 -> 220 -0.10664  
209 -> 220 0.25932

|            |          |
|------------|----------|
| 210 -> 220 | -0.14068 |
| 211 -> 220 | 0.38556  |
| 211 -> 221 | 0.12322  |
| 212 -> 220 | 0.27850  |
| 216 -> 221 | -0.15024 |
| 219 -> 224 | -0.20369 |
| 219 -> 225 | -0.15446 |

SavETr: write IOETrn= 770 NScale= 10 NData= 16 NLR=1 NState= 15 LETran= 280.

### Compound (3)

Excitation energies and oscillator strengths:

Excited State 1: Singlet-A 2.1995 eV 563.69 nm f=0.2907 <S\*\*2>=0.000

|            |          |
|------------|----------|
| 260 -> 281 | -0.14623 |
| 261 -> 278 | 0.21750  |
| 261 -> 282 | -0.10554 |
| 262 -> 279 | -0.18839 |
| 263 -> 279 | -0.11957 |
| 263 -> 280 | 0.25662  |
| 264 -> 281 | -0.20987 |
| 265 -> 278 | -0.16418 |
| 266 -> 267 | 0.32604  |

This state for optimization and/or second-order correction.

Total Energy, E(TD-HF/TD-KS) = -5473.96302368

Copying the excited state density for this state as the 1-particle RhoCI density.

Excited State 2: Singlet-A 2.2072 eV 561.72 nm f=0.0001 <S\*\*2>=0.000

|            |          |
|------------|----------|
| 260 -> 280 | 0.14000  |
| 261 -> 280 | -0.21029 |
| 263 -> 269 | -0.10492 |
| 263 -> 272 | -0.11276 |

|            |          |
|------------|----------|
| 263 -> 273 | -0.12844 |
| 263 -> 278 | 0.30719  |
| 263 -> 279 | 0.14155  |
| 263 -> 281 | 0.30799  |
| 263 -> 282 | -0.15286 |
| 264 -> 279 | -0.10162 |
| 264 -> 280 | 0.21496  |
| 265 -> 280 | 0.16661  |

Excited State 3: Singlet-A 2.2095 eV 561.15 nm f=0.0000 <S\*\*2>=0.000

|            |          |
|------------|----------|
| 260 -> 279 | -0.13093 |
| 261 -> 279 | -0.20326 |
| 261 -> 280 | -0.10414 |
| 262 -> 269 | -0.10496 |
| 262 -> 272 | 0.11207  |
| 262 -> 273 | -0.12653 |
| 262 -> 278 | -0.31993 |
| 262 -> 281 | 0.31487  |
| 262 -> 282 | 0.15093  |
| 264 -> 279 | -0.19657 |
| 264 -> 280 | -0.10657 |
| 265 -> 279 | 0.15993  |

Excited State 4: Singlet-A 2.2099 eV 561.04 nm f=0.0056 <S\*\*2>=0.000

|            |          |
|------------|----------|
| 260 -> 278 | -0.16699 |
| 261 -> 281 | 0.24965  |
| 262 -> 279 | 0.27452  |
| 262 -> 280 | 0.14514  |
| 263 -> 279 | -0.11877 |
| 263 -> 280 | 0.24410  |



264 -> 278 -0.24677  
264 -> 282 0.12021  
265 -> 281 -0.18860

Excited State 5: Singlet-A 2.2434 eV 552.65 nm f=0.6568 <S\*\*2>=0.000

261 -> 278 -0.11768  
262 -> 279 0.13408  
263 -> 280 -0.13645  
264 -> 267 0.20218  
264 -> 281 0.11953  
266 -> 267 0.56636

Excited State 6: Singlet-A 2.5805 eV 480.46 nm f=0.0032 <S\*\*2>=0.000

256 -> 278 -0.25256  
256 -> 281 -0.16735  
256 -> 282 0.12777  
257 -> 278 -0.10363  
257 -> 281 -0.21661  
263 -> 279 -0.16125  
263 -> 280 0.34629  
264 -> 278 0.11510

Excited State 7: Singlet-A 2.5822 eV 480.16 nm f=0.0068 <S\*\*2>=0.000

256 -> 278 0.11374  
256 -> 281 -0.21293  
257 -> 278 -0.26580  
257 -> 281 0.16690  
257 -> 282 0.12873  
261 -> 278 -0.10174  
262 -> 279 -0.31618

|            |          |
|------------|----------|
| 262 -> 280 | -0.17282 |
| 262 -> 281 | 0.14158  |
| 264 -> 281 | 0.11166  |
| 265 -> 278 | 0.10045  |

Excited State 8: Singlet-A 2.6289 eV 471.62 nm f=0.0000 <S\*\*2>=0.000

|            |          |
|------------|----------|
| 256 -> 279 | 0.14109  |
| 256 -> 280 | -0.30676 |
| 257 -> 279 | 0.10998  |
| 257 -> 280 | -0.23846 |
| 260 -> 280 | -0.16476 |
| 261 -> 279 | -0.10516 |
| 261 -> 280 | 0.22883  |
| 263 -> 278 | 0.17210  |
| 263 -> 281 | 0.16885  |
| 264 -> 280 | -0.20888 |
| 265 -> 280 | -0.15077 |

Excited State 9: Singlet-A 2.6304 eV 471.34 nm f=0.0000 <S\*\*2>=0.000

|            |          |
|------------|----------|
| 256 -> 279 | 0.21571  |
| 256 -> 280 | 0.11806  |
| 257 -> 279 | -0.28607 |
| 257 -> 280 | -0.15707 |
| 257 -> 281 | 0.12439  |
| 260 -> 279 | 0.15181  |
| 261 -> 279 | 0.20599  |
| 261 -> 280 | 0.11426  |
| 262 -> 278 | -0.18250 |
| 262 -> 281 | 0.16203  |
| 264 -> 279 | 0.19153  |

264 -> 280 0.10503  
265 -> 279 -0.13676

Excited State 10: Singlet-A 2.9288 eV 423.33 nm f=0.0827 <S\*\*2>=0.000

259 -> 267 0.26128  
261 -> 267 0.26762  
265 -> 267 0.56297

Excited State 11: Singlet-A 3.1692 eV 391.22 nm f=1.3333 <S\*\*2>=0.000

258 -> 267 0.32886  
260 -> 267 0.40491  
264 -> 267 -0.40146  
266 -> 267 0.14981

Excited State 12: Singlet-A 3.4456 eV 359.83 nm f=0.0012 <S\*\*2>=0.000

256 -> 278 0.22426  
256 -> 281 0.18969  
256 -> 282 -0.10995  
257 -> 278 0.13837  
257 -> 281 0.18094  
261 -> 281 -0.11519  
263 -> 279 -0.15243  
263 -> 280 0.33129  
264 -> 278 0.10472

Excited State 13: Singlet-A 3.4476 eV 359.63 nm f=0.0011 <S\*\*2>=0.000

256 -> 278 -0.14655  
256 -> 281 0.17665  
257 -> 278 0.23853  
257 -> 281 -0.19068

|            |          |
|------------|----------|
| 257 -> 282 | -0.11050 |
| 261 -> 278 | -0.12760 |
| 262 -> 279 | -0.30150 |
| 262 -> 280 | -0.16614 |
| 262 -> 281 | 0.13693  |

Excited State 14: Singlet-A 3.5282 eV 351.41 nm f=0.0001 <S\*\*2>=0.000

|            |          |
|------------|----------|
| 256 -> 279 | -0.16681 |
| 256 -> 280 | 0.35834  |
| 257 -> 279 | -0.12853 |
| 257 -> 280 | 0.27880  |
| 261 -> 280 | 0.15136  |
| 263 -> 278 | 0.16407  |
| 263 -> 281 | 0.15508  |
| 264 -> 280 | -0.18195 |
| 265 -> 280 | -0.15614 |

Excited State 15: Singlet-A 3.5292 eV 351.31 nm f=0.0004 <S\*\*2>=0.000

|            |          |
|------------|----------|
| 256 -> 279 | -0.25143 |
| 256 -> 280 | -0.13825 |
| 256 -> 281 | 0.10777  |
| 257 -> 279 | 0.33354  |
| 257 -> 280 | 0.18201  |
| 257 -> 281 | -0.14337 |
| 261 -> 279 | 0.13699  |
| 262 -> 278 | -0.17418 |
| 262 -> 281 | 0.15002  |
| 264 -> 279 | 0.16716  |
| 265 -> 279 | -0.14177 |

SavETr: write IOETrn= 770 NScale= 10 NData= 16 NLR=1 NState= 15 LETran= 280.

## Compound (4)

Excitation energies and oscillator strengths:

Excited State 1: Singlet-A 1.9835 eV 625.08 nm f=0.0003 <S\*\*2>=0.000  
293 -> 301 0.42268  
293 -> 309 -0.10126  
293 -> 315 0.44673  
294 -> 314 0.25327

This state for optimization and/or second-order correction.

Total Energy, E(TD-HF/TD-KS) = -5921.35221861

Copying the excited state density for this state as the 1-particle RhoCI density.

Excited State 2: Singlet-A 2.0332 eV 609.80 nm f=0.0119 <S\*\*2>=0.000  
293 -> 314 -0.28124  
294 -> 301 0.39183  
294 -> 315 0.44458

Excited State 3: Singlet-A 2.2046 eV 562.39 nm f=0.1538 <S\*\*2>=0.000  
295 -> 316 0.27255  
296 -> 316 0.10594  
296 -> 317 -0.38033  
297 -> 302 0.10059  
297 -> 306 -0.10586  
297 -> 316 0.26780  
298 -> 299 -0.23377  
298 -> 316 -0.12446

Excited State 4: Singlet-A 2.2082 eV 561.46 nm f=0.0001 <S\*\*2>=0.000  
295 -> 317 0.27026  
296 -> 302 0.12995  
296 -> 306 -0.16146  
296 -> 312 0.13460  
296 -> 316 0.43224  
296 -> 317 0.11985  
296 -> 318 -0.15336  
297 -> 317 0.27722  
298 -> 317 -0.13035

Excited State 5: Singlet-A 2.2487 eV 551.36 nm f=0.7705 <S\*\*2>=0.000  
296 -> 317 -0.15699  
297 -> 299 0.27305  
297 -> 316 0.10387  
298 -> 299 0.57898

Excited State 6: Singlet-A 2.4422 eV 507.67 nm f=0.0027 <S\*\*2>=0.000  
286 -> 301 0.21648  
286 -> 315 0.30594

|                   |            |                                           |
|-------------------|------------|-------------------------------------------|
|                   | 287 -> 301 | 0.18050                                   |
|                   | 287 -> 315 | 0.24963                                   |
|                   | 289 -> 301 | 0.10009                                   |
|                   | 289 -> 315 | 0.13335                                   |
|                   | 293 -> 314 | -0.40834                                  |
|                   | 294 -> 314 | 0.12432                                   |
| Excited State 7:  | Singlet-A  | 2.5808 eV 480.42 nm f=0.0057 <S**2>=0.000 |
|                   | 290 -> 302 | -0.10173                                  |
|                   | 290 -> 306 | 0.13440                                   |
|                   | 290 -> 312 | -0.11628                                  |
|                   | 290 -> 316 | -0.38603                                  |
|                   | 290 -> 318 | 0.13912                                   |
|                   | 295 -> 316 | 0.12761                                   |
|                   | 296 -> 317 | 0.39083                                   |
|                   | 297 -> 316 | 0.16164                                   |
| Excited State 8:  | Singlet-A  | 2.5917 eV 478.38 nm f=0.0001 <S**2>=0.000 |
|                   | 286 -> 314 | 0.26742                                   |
|                   | 287 -> 314 | 0.21010                                   |
|                   | 289 -> 314 | 0.21266                                   |
|                   | 293 -> 301 | -0.15548                                  |
|                   | 293 -> 314 | 0.14875                                   |
|                   | 294 -> 314 | 0.50649                                   |
| Excited State 9:  | Singlet-A  | 2.6301 eV 471.40 nm f=0.0000 <S**2>=0.000 |
|                   | 290 -> 316 | 0.10035                                   |
|                   | 290 -> 317 | -0.42108                                  |
|                   | 291 -> 317 | -0.11224                                  |
|                   | 295 -> 317 | -0.30687                                  |
|                   | 296 -> 316 | 0.24264                                   |
|                   | 297 -> 317 | -0.26711                                  |
|                   | 298 -> 317 | 0.11399                                   |
| Excited State 10: | Singlet-A  | 2.9701 eV 417.44 nm f=0.2093 <S**2>=0.000 |
|                   | 291 -> 299 | 0.21835                                   |
|                   | 292 -> 299 | -0.18416                                  |
|                   | 295 -> 299 | -0.34913                                  |
|                   | 297 -> 299 | 0.43790                                   |
|                   | 298 -> 299 | -0.19428                                  |
|                   | 298 -> 300 | 0.12524                                   |
| Excited State 11: | Singlet-A  | 3.0743 eV 403.29 nm f=0.0172 <S**2>=0.000 |
|                   | 286 -> 301 | -0.20908                                  |
|                   | 286 -> 315 | -0.19994                                  |
|                   | 287 -> 301 | -0.16805                                  |
|                   | 287 -> 315 | -0.16766                                  |
|                   | 289 -> 301 | -0.14995                                  |
|                   | 289 -> 315 | -0.10684                                  |
|                   | 293 -> 314 | -0.41317                                  |

|                   |           |            |                                 |
|-------------------|-----------|------------|---------------------------------|
|                   |           | 294 -> 301 | -0.32683                        |
|                   |           | 294 -> 314 | 0.10571                         |
| Excited State 12: | Singlet-A | 3.2154 eV  | 385.59 nm f=1.8019 <S**2>=0.000 |
|                   |           | 291 -> 299 | 0.19219                         |
|                   |           | 292 -> 299 | 0.41356                         |
|                   |           | 292 -> 300 | 0.18249                         |
|                   |           | 295 -> 300 | 0.14283                         |
|                   |           | 297 -> 299 | 0.12884                         |
|                   |           | 297 -> 300 | -0.25184                        |
|                   |           | 298 -> 300 | -0.29144                        |
| Excited State 13: | Singlet-A | 3.2951 eV  | 376.27 nm f=0.0013 <S**2>=0.000 |
|                   |           | 286 -> 314 | 0.33131                         |
|                   |           | 287 -> 314 | 0.27728                         |
|                   |           | 289 -> 314 | 0.12919                         |
|                   |           | 293 -> 301 | 0.40218                         |
|                   |           | 293 -> 315 | -0.19067                        |
|                   |           | 294 -> 301 | -0.10414                        |
|                   |           | 294 -> 314 | -0.22828                        |
| Excited State 14: | Singlet-A | 3.3603 eV  | 368.96 nm f=0.0126 <S**2>=0.000 |
|                   |           | 281 -> 299 | 0.10619                         |
|                   |           | 283 -> 299 | 0.15563                         |
|                   |           | 291 -> 299 | 0.13237                         |
|                   |           | 292 -> 299 | 0.40950                         |
|                   |           | 292 -> 300 | -0.15577                        |
|                   |           | 297 -> 300 | 0.20479                         |
|                   |           | 298 -> 300 | 0.34662                         |
| Excited State 15: | Singlet-A | 3.4492 eV  | 359.46 nm f=0.0412 <S**2>=0.000 |
|                   |           | 289 -> 300 | -0.12159                        |
|                   |           | 294 -> 299 | 0.34343                         |
|                   |           | 294 -> 300 | 0.54333                         |
|                   |           | 294 -> 301 | -0.15898                        |
|                   |           | 298 -> 300 | -0.10477                        |

SavETr: write IOETrn= 770 NScale= 10 NData= 16 NLR=1 NState= 15 LETran= 280.

## Compound (5)

Excitation energies and oscillator strengths:

|                  |           |            |                                 |
|------------------|-----------|------------|---------------------------------|
| Excited State 1: | Singlet-A | 1.9828 eV  | 625.30 nm f=0.0003 <S**2>=0.000 |
|                  |           | 326 -> 334 | 0.32003                         |
|                  |           | 326 -> 335 | 0.28032                         |

326 -> 345 -0.10090  
326 -> 352 0.44300  
328 -> 350 -0.19413  
328 -> 351 -0.10921

This state for optimization and/or second-order correction.

Total Energy, E(TD-HF/TD-KS) = -6368.73337332

Copying the excited state density for this state as the 1-particle RhoCI density.

Excited State 2: Singlet-A 1.9829 eV 625.27 nm f=0.0003 <S\*\*2>=0.000

327 -> 334 -0.27756  
327 -> 335 0.31093  
327 -> 353 -0.44402  
329 -> 350 0.13428  
329 -> 351 -0.18421

Excited State 3: Singlet-A 2.0324 eV 610.04 nm f=0.0146 <S\*\*2>=0.000

327 -> 350 -0.15734  
327 -> 351 0.21134  
328 -> 335 -0.10250  
328 -> 353 0.13380  
329 -> 334 -0.25240  
329 -> 335 0.27044  
329 -> 353 -0.42233

Excited State 4: Singlet-A 2.0334 eV 609.74 nm f=0.0115 <S\*\*2>=0.000

326 -> 349 0.10188  
326 -> 350 0.22591  
326 -> 351 0.12401  
328 -> 334 0.28969  
328 -> 335 0.24290



328 -> 352 0.42291

329 -> 352 0.12876

Excited State 5: Singlet-A 2.2949 eV 540.26 nm f=0.9202 <S\*\*2>=0.000

330 -> 331 0.68569

Excited State 6: Singlet-A 2.4421 eV 507.69 nm f=0.0028 <S\*\*2>=0.000

318 -> 334 0.16570

318 -> 335 0.14470

318 -> 352 0.30725

320 -> 334 0.13587

320 -> 335 0.11871

320 -> 352 0.24740

322 -> 352 0.10859

326 -> 349 0.14859

326 -> 350 0.33367

326 -> 351 0.18575

Excited State 7: Singlet-A 2.4424 eV 507.64 nm f=0.0021 <S\*\*2>=0.000

319 -> 334 0.14337

319 -> 335 -0.16010

319 -> 353 0.30781

321 -> 334 0.11739

321 -> 335 -0.13113

321 -> 353 0.24753

323 -> 353 0.11019

327 -> 349 -0.11552

327 -> 350 0.23247

327 -> 351 -0.31610

Excited State 8: Singlet-A 2.5930 eV 478.15 nm f=0.0000 <S\*\*2>=0.000

|            |          |
|------------|----------|
| 318 -> 350 | -0.21931 |
| 318 -> 351 | -0.12344 |
| 320 -> 350 | -0.16882 |
| 322 -> 350 | -0.14299 |
| 323 -> 350 | -0.10119 |
| 326 -> 334 | -0.11740 |
| 326 -> 335 | -0.10279 |
| 326 -> 350 | -0.10849 |
| 328 -> 349 | -0.17816 |
| 328 -> 350 | -0.39662 |
| 328 -> 351 | -0.22306 |
| 329 -> 350 | -0.12162 |

Excited State 9: Singlet-A 2.5934 eV 478.08 nm f=0.0001 <S\*\*2>=0.000

|            |          |
|------------|----------|
| 319 -> 350 | -0.15229 |
| 319 -> 351 | 0.20906  |
| 321 -> 350 | -0.11670 |
| 321 -> 351 | 0.15996  |
| 323 -> 351 | 0.13636  |
| 327 -> 334 | -0.10215 |
| 327 -> 335 | 0.11422  |
| 327 -> 351 | 0.10753  |
| 328 -> 351 | -0.11858 |
| 329 -> 349 | 0.13865  |
| 329 -> 350 | -0.27491 |
| 329 -> 351 | 0.37713  |

Excited State 10: Singlet-A 3.0719 eV 403.60 nm f=0.0155 <S\*\*2>=0.000

|            |         |
|------------|---------|
| 319 -> 334 | 0.13783 |
|------------|---------|

|            |          |
|------------|----------|
| 319 -> 335 | -0.15405 |
| 319 -> 353 | 0.20094  |
| 321 -> 334 | 0.10851  |
| 321 -> 335 | -0.12121 |
| 321 -> 353 | 0.16432  |
| 327 -> 349 | 0.11752  |
| 327 -> 350 | -0.23317 |
| 327 -> 351 | 0.32142  |
| 329 -> 334 | 0.20395  |
| 329 -> 335 | -0.22950 |

Excited State 11: Singlet-A 3.0749 eV 403.22 nm f=0.0127 <S\*\*2>=0.000

|            |          |
|------------|----------|
| 318 -> 334 | -0.15933 |
| 318 -> 335 | -0.13929 |
| 318 -> 352 | -0.20047 |
| 320 -> 334 | -0.12589 |
| 320 -> 335 | -0.10995 |
| 320 -> 352 | -0.16451 |
| 326 -> 349 | 0.15122  |
| 326 -> 350 | 0.33730  |
| 326 -> 351 | 0.19075  |
| 328 -> 334 | -0.23620 |
| 328 -> 335 | -0.20860 |

Excited State 12: Singlet-A 3.1239 eV 396.89 nm f=0.1321 <S\*\*2>=0.000

|            |         |
|------------|---------|
| 324 -> 332 | 0.15654 |
| 325 -> 331 | 0.55923 |
| 330 -> 332 | 0.28081 |

Excited State 13: Singlet-A 3.2686 eV 379.32 nm f=2.4497 <S\*\*2>=0.000

|            |          |
|------------|----------|
| 316 -> 333 | -0.10344 |
| 324 -> 331 | 0.51300  |
| 325 -> 332 | 0.24241  |
| 329 -> 332 | -0.11252 |
| 330 -> 333 | -0.28990 |

Excited State 14: Singlet-A 3.2928 eV 376.54 nm f=0.0153 <S\*\*2>=0.000

|            |          |
|------------|----------|
| 319 -> 350 | -0.18815 |
| 319 -> 351 | 0.25836  |
| 321 -> 350 | -0.15439 |
| 321 -> 351 | 0.21207  |
| 327 -> 334 | 0.26062  |
| 327 -> 335 | -0.29317 |
| 327 -> 353 | -0.19078 |
| 329 -> 350 | 0.12110  |
| 329 -> 351 | -0.16791 |

Excited State 15: Singlet-A 3.2974 eV 376.01 nm f=0.0031 <S\*\*2>=0.000

|            |          |
|------------|----------|
| 318 -> 349 | 0.12256  |
| 318 -> 350 | 0.27226  |
| 318 -> 351 | 0.15331  |
| 320 -> 349 | 0.10047  |
| 320 -> 350 | 0.22375  |
| 320 -> 351 | 0.12596  |
| 326 -> 334 | -0.30249 |
| 326 -> 335 | -0.26678 |
| 326 -> 352 | 0.18787  |
| 328 -> 350 | -0.17777 |
| 328 -> 351 | -0.10110 |

SavETr: write IOETrn= 770 NScale= 10 NData= 16 NLR=1 NState= 15 LETran= 280.

## References

[1] Frisch, M. J.; Trucks, G. W.; Schlegel, G. W.; Scuseria, G. E.; Robb, M. A.; Cheeseman, J. R.; Scalmani, G.; Barone, V.; Petersson, G. A.; Li, Nakatsuji, X.; Caricato, M.; Marenich, A.; Bloino, J.; Janesko, B. G.; Gomperts, R.; Mennucci, B.; Hratchian, H. P.; Ortiz, J. V.; Izmaylov, A. F.; Sonnenberg, J. L.; Williams-Young, D.; Ding, F.; Lipparini, F.; Egidi, F.; Goings, J.; Peng, B.; Petrone, A.; Henderson, T.; Ranasinghe, D.; Zakrzewski, V. G.; Gao, J.; Rega, N.; Zheng, G.; Liang, W.; Hada, M.; Ehara, M.; Toyota, K.; Fukuda, R.; Hasegawa, J.; Ishida, M.; Nakajima, T.; Honda, Y.; Kitao, O.; Nakai, H.; Vreven, T.; Throssell, K.; Montgomery, J. A.; Peralta, J. E., Jr.; Ogliaro, F.; Bearpark, M.; Heyd, J. J.; Brothers, E.; Kudin, K. N.; Staroverov, V. N.; Keith, T.; Kobayashi, R.; Normand, J.; Raghavachari, K.; Rendell, A.; Burant, J. C.; Iyengar, S. S.; Tomasi, J.; Cossi, M.; Millam, J. M.; Klene, M.; Adamo, C.; Cammi, R.; Ochterski, J. W.; Martin, R. L.; Morokuma, K.; Farkas, O.; Foresman, J. B.; Fox, D. J. Gaussian 09, rev. A.02; Gaussian, Inc.: Wallingford, CT, **2016**.
